# Supplementary material for: Development of a Sequence-Based Reference Physical Map of Pea (Pisum sativum L.)
Source: Front Plant Sci. 2019 Mar 15;10:323. doi: 10.3389/fpls.2019.00323 (PMC6428963; doi:10.3389/fpls.2019.00323)
Supplement: TABLE S4 — Distribution of BAC clones in contigs built based on the sequence similarities of unique sequence tags. [file Table_4.xlsx]

## Sheet: BACs
Contig	Bac No.	Bac ID	Count of sequence	Ends_left	Ends_right
ctg10011	1	Psa.0717.K08	28	251	278
ctg10011	2	Psa.0654.D20	27	255	281
ctg10011	3	Psa.0121.P18	22	241	262
ctg10011	4	Psa.0368.P06	24	259	282
ctg10011	5	Psa.0023.O02	17	259	275
ctg10011	6	Psa.0266.K06	18	262	279
ctg10011	7	Psa.0744.B13	41	257	297
ctg10011	8	Psa.0204.G23	40	255	294
ctg10011	9	Psa.0062.C20	27	246	272
ctg10011	10	Psa.0188.H02	36	252	287
ctg10011	11	Psa.0055.C15	32	256	287
ctg10011	12	Psa.0244.D14	18	250	267
ctg11290	13	Psa.0113.K07	35	109	143
ctg11290	14	Psa.0655.B04	29	101	129
ctg11290	15	Psa.0673.M04	39	102	140
ctg11290	16	Psa.0512.F12	40	88	127
ctg11290	17	Psa.0420.M20	39	100	138
ctg11290	18	Psa.0608.H08	10	106	115
ctg11290	19	Psa.0499.O14	43	97	139
ctg11290	20	Psa.0324.A24	31	99	129
ctg11290	21	Psa.0112.K18	41	85	125
ctg210	22	Psa.0426.F16	37	134	170
ctg210	23	Psa.0733.H02	33	128	160
ctg210	24	Psa.0600.K21	24	120	143
ctg210	25	Psa.0001.F24	20	129	148
ctg210	26	Psa.0288.B03	35	111	145
ctg210	27	Psa.0309.M21	23	127	149
ctg210	28	Psa.0486.E05	28	136	163
ctg210	29	Psa.0066.J18	18	135	152
ctg210	30	Psa.0749.D07	28	112	139
ctg765	31	Psa.0309.E07	25	96	120
ctg765	32	Psa.0149.D06	14	93	106
ctg765	33	Psa.0104.P15	20	99	118
ctg765	34	Psa.0647.E18	39	74	112
ctg765	35	Psa.0458.K03	67	48	114
ctg765	36	Psa.0192.B02	70	42	111
ctg765	37	Psa.0078.H16	40	65	104
ctg10642	38	Psa.0343.I05	28	211	238
ctg10642	39	Psa.0157.B04	42	218	259
ctg10642	40	Psa.0108.P01	50	204	253
ctg10642	41	Psa.0349.M18	43	208	250
ctg10642	42	Psa.0087.N14	24	201	224
ctg10642	43	Psa.0754.H19	7	225	231
ctg5022	44	Psa.0018.O10	8	180	187
ctg5022	45	Psa.0503.E14	32	161	192
ctg5022	46	Psa.0220.E03	34	151	184
ctg5022	47	Psa.0482.K20	38	155	192
ctg5022	48	Psa.0343.B10	24	168	191
ctg5022	49	Psa.0139.M19	32	158	189
ctg5022	50	Psa.0056.E14	36	156	191
ctg5022	51	Psa.0694.N10	29	159	187
ctg5022	52	Psa.0436.I12	38	164	201
ctg5022	53	Psa.0344.A09	27	167	193
ctg13527	54	Psa.0060.N13	26	0	25
ctg13527	55	Psa.0529.A23	15	15	29
ctg13527	56	Psa.0130.H05	24	4	27
ctg13527	57	Psa.0401.F12	24	8	31
singleton	58	Psa.0381.B01	19
ctg13527	59	Psa.0230.I20	8	16	23
ctg8242	60	Psa.0117.K01	34	31	64
ctg8242	61	Psa.0295.H02	35	32	66
ctg8242	62	Psa.0214.I10	30	38	67
ctg11628	63	Psa.0485.C12	24	116	139
ctg11628	64	Psa.0173.J16	13	132	144
ctg11392	65	Psa.0432.A01	48	91	138
ctg11392	66	Psa.0204.C23	57	81	137
ctg11392	67	Psa.0249.F16	55	77	131
ctg2968	68	Psa.0098.F22	27	119	145
ctg2968	69	Psa.0441.K22	28	103	130
ctg14858	70	Psa.0466.I24	9	3	11
ctg7671	71	Psa.0318.M12	42	135	176
ctg14858	72	Psa.0392.F21	28	1	28
ctg7671	73	Psa.0564.B17	19	140	158
ctg14858	74	Psa.0616.K08	23	0	22
ctg7671	75	Psa.0520.M19	24	121	144
ctg7671	76	Psa.0495.N20	29	142	170
ctg14858	77	Psa.0107.A18	24	4	27
ctg11536	78	Psa.0373.O15	34	14	47
ctg11536	79	Psa.0433.L19	33	7	39
ctg11536	80	Psa.0153.E04	46	14	59
ctg11536	81	Psa.0597.L11	29	20	48
ctg11536	82	Psa.0728.B09	45	28	72
ctg11536	83	Psa.0568.J16	37	13	49
ctg11536	84	Psa.0474.E24	30	13	42
ctg6525	85	Psa.0046.D09	23	39	61
ctg11223	86	Psa.0636.B13	50	59	108
ctg11223	87	Psa.0639.K09	59	38	96
ctg6525	88	Psa.0145.N19	31	35	65
ctg6525	89	Psa.0219.D01	41	24	64
ctg11223	90	Psa.0239.F14	42	66	107
ctg11223	91	Psa.0453.H04	28	36	63
ctg11223	92	Psa.0127.L04	45	36	80
ctg11223	93	Psa.0434.O16	54	49	102
ctg1220	94	Psa.0247.O09	46	11	56
ctg1220	95	Psa.0525.C12	29	0	28
ctg1220	96	Psa.0038.M23	21	3	23
ctg1220	97	Psa.0472.B07	56	18	73
ctg1220	98	Psa.0442.K05	37	20	56
ctg13081	99	Psa.0049.M01	30	2	31
singleton	100	Psa.0686.N12	31
ctg7545	101	Psa.0373.M01	33	119	151
ctg7545	102	Psa.0236.L10	62	98	159
ctg7545	103	Psa.0266.H13	69	96	164
ctg7545	104	Psa.0292.L10	58	91	148
ctg7545	105	Psa.0458.A13	65	86	150
ctg7545	106	Psa.0468.I24	67	116	182
ctg10686	107	Psa.0122.P06	51	435	485
ctg10686	108	Psa.0007.A23	61	435	495
ctg10686	109	Psa.0189.O15	50	409	458
ctg10686	110	Psa.0385.F24	49	440	488
ctg10686	111	Psa.0349.P16	59	397	455
ctg10686	112	Psa.0479.A05	34	422	455
ctg10686	113	Psa.0045.A07	55	444	498
ctg10686	114	Psa.0450.C14	61	402	462
ctg10686	115	Psa.0695.O21	40	427	466
ctg483	116	Psa.0488.E21	31	0	30
ctg483	117	Psa.0063.K16	17	4	20
ctg483	118	Psa.0427.C18	43	0	42
ctg11508	119	Psa.0695.L19	68	115	182
ctg10476	120	Psa.0086.D02	17	0	16
ctg10476	121	Psa.0507.E23	16	0	15
ctg10651	122	Psa.0595.F01	19	39	57
ctg10651	123	Psa.0457.G13	47	46	92
ctg10651	124	Psa.0306.M10	28	29	56
ctg10651	125	Psa.0319.P06	22	47	68
ctg10651	126	Psa.0403.H18	22	33	54
ctg10651	127	Psa.0486.G20	43	56	98
ctg10651	128	Psa.0581.F02	26	43	68
ctg11351	129	Psa.0433.G11	57	35	91
ctg11351	130	Psa.0690.P11	29	64	92
ctg11351	131	Psa.0124.I06	38	62	99
ctg11351	132	Psa.0630.P02	34	66	99
ctg2393	133	Psa.0020.M21	70	330	399
ctg2393	134	Psa.0611.L04	40	319	358
ctg2393	135	Psa.0709.G08	52	326	377
ctg2393	136	Psa.0588.G05	32	327	358
ctg2393	137	Psa.0563.B08	37	323	359
singleton	138	Psa.0616.I15	23
ctg4863	139	Psa.0331.D10	46	210	255
ctg12857	140	Psa.0209.C09	47	0	46
ctg707	141	Psa.0497.F11	55	143	197
ctg12857	142	Psa.0299.N18	29	6	34
ctg707	143	Psa.0363.G05	38	176	213
ctg18600	144	Psa.0474.H17	35	0	34
ctg4863	145	Psa.0348.I23	26	231	256
ctg707	146	Psa.0342.H16	47	143	189
ctg707	147	Psa.0479.H18	48	139	186
ctg786	148	Psa.0065.E01	81	659	739
ctg12857	149	Psa.0043.C16	39	7	45
ctg4863	150	Psa.0405.B15	31	229	259
ctg707	151	Psa.0647.F03	45	161	205
singleton	152	Psa.0054.N10	33
ctg12943	153	Psa.0437.G01	46	0	45
ctg1225	154	Psa.0254.L04	42	20	61
ctg1225	155	Psa.0495.G09	38	13	50
ctg1225	156	Psa.0710.G10	49	22	70
ctg14234	157	Psa.0085.F22	45	5	49
singleton	158	Psa.0489.O16	38
ctg13893	159	Psa.0073.B13	38	5	42
ctg13893	160	Psa.0632.D04	35	6	40
ctg13893	161	Psa.0230.N09	30	9	38
ctg14234	162	Psa.0161.L16	47	0	46
ctg15263	163	Psa.0300.F17	40	3	42
ctg16031	164	Psa.0161.E07	45	3	47
ctg15263	165	Psa.0293.J21	50	3	52
ctg15263	166	Psa.0051.L15	51	3	53
ctg16031	167	Psa.0319.J11	58	0	57
ctg7865	168	Psa.0072.F15	28	230	257
ctg7865	169	Psa.0172.J12	41	233	273
ctg7865	170	Psa.0083.I04	43	232	274
ctg14663	171	Psa.0226.N19	30	14	43
ctg14663	172	Psa.0504.F02	38	3	40
ctg14663	173	Psa.0100.J22	38	0	37
ctg14407	174	Psa.0324.K05	47	4	50
ctg14407	175	Psa.0588.F02	46	3	48
ctg14407	176	Psa.0241.H24	47	0	46
ctg14407	177	Psa.0091.H11	20	1	20
ctg8833	178	Psa.0218.N18	30	22	51
ctg8833	179	Psa.0297.I24	27	23	49
ctg8833	180	Psa.0072.P13	27	24	50
ctg8833	181	Psa.0139.F16	32	22	53
ctg8833	182	Psa.0113.K21	28	23	50
ctg8833	183	Psa.0184.E12	15	23	37
ctg8833	184	Psa.0206.F03	19	21	39
ctg8833	185	Psa.0007.N04	22	38	59
ctg3052	186	Psa.0405.E12	35	5	39
ctg3052	187	Psa.0226.D14	26	4	29
ctg3052	188	Psa.0487.K20	19	16	34
ctg3052	189	Psa.0279.A04	28	10	37
ctg3052	190	Psa.0190.N02	35	14	48
ctg3052	191	Psa.0367.I12	31	0	30
ctg3052	192	Psa.0145.J18	35	10	44
ctg3052	193	Psa.0317.L21	34	5	38
ctg3052	194	Psa.0389.N19	32	9	40
ctg3052	195	Psa.0690.C22	31	9	39
ctg3052	196	Psa.0031.O14	21	18	38
ctg3052	197	Psa.0480.I18	34	12	45
ctg3052	198	Psa.0602.N16	28	13	40
ctg3052	199	Psa.0419.G15	33	1	33
ctg3052	200	Psa.0459.P15	27	7	33
ctg2377	201	Psa.0492.I17	23	25	47
ctg2377	202	Psa.0359.F10	28	25	52
ctg2377	203	Psa.0350.A18	22	27	48
ctg2377	204	Psa.0559.D11	24	22	45
ctg960	205	Psa.0752.J05	24	324	347
ctg960	206	Psa.0061.G05	25	324	348
ctg960	207	Psa.0386.D17	49	305	353
ctg960	208	Psa.0069.J03	25	322	346
ctg960	209	Psa.0626.J07	30	315	344
ctg960	210	Psa.0250.C17	21	332	352
ctg960	211	Psa.0504.B17	38	302	339
ctg550	212	Psa.0681.E22	51	190	240
ctg550	213	Psa.0181.A08	67	176	242
ctg550	214	Psa.0229.L15	44	172	215
ctg550	215	Psa.0697.H23	37	187	223
ctg550	216	Psa.0374.E13	44	171	214
ctg550	217	Psa.0406.B21	54	163	216
ctg550	218	Psa.0159.I01	45	177	221
ctg4026	219	Psa.0354.P05	8	56	63
ctg4026	220	Psa.0505.N05	41	22	62
ctg4026	221	Psa.0542.C05	25	41	65
ctg4026	222	Psa.0459.E07	22	60	81
ctg4026	223	Psa.0454.E09	31	56	86
ctg4026	224	Psa.0122.B08	25	61	85
ctg4026	225	Psa.0619.N22	29	56	84
ctg4026	226	Psa.0042.L20	41	36	76
ctg13273	227	Psa.0055.A03	13	0	12
ctg13273	228	Psa.0602.I21	14	2	15
ctg1309	229	Psa.0466.F13	22	275	296
ctg1309	230	Psa.0032.J05	23	295	317
ctg1309	231	Psa.0501.N16	25	279	303
ctg1309	232	Psa.0435.N20	36	292	327
ctg1309	233	Psa.0292.N23	31	297	327
ctg1309	234	Psa.0406.D18	32	274	305
ctg1309	235	Psa.0556.J21	19	287	305
ctg1052	236	Psa.0658.F02	34	223	256
ctg1052	237	Psa.0065.B19	45	206	250
ctg1052	238	Psa.0354.N20	38	229	266
ctg1052	239	Psa.0225.D05	45	236	280
ctg1052	240	Psa.0122.B17	49	226	274
ctg1052	241	Psa.0079.C01	48	218	265
ctg1052	242	Psa.0205.N18	51	214	264
ctg6584	243	Psa.0753.C08	29	135	163
ctg11642	244	Psa.0622.G20	46	94	139
ctg11642	245	Psa.0296.N22	36	100	135
ctg11642	246	Psa.0721.P18	38	86	123
ctg6584	247	Psa.0193.C23	34	152	185
ctg11642	248	Psa.0325.O11	52	87	138
ctg6584	249	Psa.0079.P07	35	115	149
ctg11642	250	Psa.0585.D11	37	105	141
ctg11642	251	Psa.0687.K09	40	74	113
ctg11642	252	Psa.0347.G14	36	121	156
ctg6584	253	Psa.0330.O16	36	118	153
ctg11642	254	Psa.0266.L18	55	87	141
ctg11642	255	Psa.0496.J03	49	98	146
ctg6584	256	Psa.0104.O12	33	144	176
ctg669	257	Psa.0133.L23	26	82	107
ctg10077	258	Psa.0348.A03	46	50	95
ctg10077	259	Psa.0233.E13	43	54	96
ctg669	260	Psa.0609.D07	26	85	110
ctg10077	261	Psa.0102.L05	34	32	65
ctg669	262	Psa.0210.F17	28	75	102
ctg669	263	Psa.0372.G22	24	77	100
ctg669	264	Psa.0532.F20	21	80	100
ctg669	265	Psa.0168.I05	36	71	106
ctg10077	266	Psa.0670.C04	49	48	96
ctg10077	267	Psa.0336.B14	46	37	82
ctg10077	268	Psa.0062.M10	42	39	80
ctg453	269	Psa.0096.L09	33	22	54
ctg453	270	Psa.0316.F20	32	38	69
ctg453	271	Psa.0155.P14	27	29	55
ctg453	272	Psa.0112.B23	48	50	97
ctg453	273	Psa.0066.J02	45	22	66
ctg5047	274	Psa.0701.J07	35	68	102
ctg8964	275	Psa.0068.H14	49	75	123
ctg8964	276	Psa.0359.H11	27	112	138
ctg10280	277	Psa.0057.M11	41	120	160
ctg10280	278	Psa.0448.E10	33	143	175
ctg5047	279	Psa.0770.M11	43	31	73
ctg8964	280	Psa.0410.L16	42	95	136
ctg5047	281	Psa.0336.B23	14	68	81
ctg11857	282	Psa.0473.D18	52	0	51
ctg10280	283	Psa.0080.H07	49	104	152
ctg11857	284	Psa.0468.H17	53	4	56
ctg8964	285	Psa.0503.A06	48	73	120
ctg8964	286	Psa.0193.O17	29	115	143
ctg5047	287	Psa.0185.E15	41	45	85
ctg8964	288	Psa.0161.F17	42	94	135
ctg10898	289	Psa.0058.K16	34	49	82
ctg10898	290	Psa.0571.D05	36	67	102
ctg10898	291	Psa.0539.B09	20	65	84
ctg10898	292	Psa.0511.L11	24	61	84
ctg10898	293	Psa.0676.B20	18	70	87
ctg10898	294	Psa.0245.N11	39	48	86
ctg10898	295	Psa.0626.O05	20	65	84
ctg10898	296	Psa.0247.L10	34	69	102
ctg9021	297	Psa.0679.H04	26	61	86
ctg9021	298	Psa.0295.O04	30	67	96
ctg9021	299	Psa.0103.B13	10	72	81
ctg9021	300	Psa.0156.P19	40	68	107
ctg6584	301	Psa.0107.L10	22	167	188
ctg6584	302	Psa.0590.L07	22	169	190
ctg16173	303	Psa.0483.N13	33	0	32
ctg16014	304	Psa.0724.M23	33	5	37
ctg16014	305	Psa.0160.F22	35	4	38
ctg16014	306	Psa.0280.M19	33	0	32
ctg16173	307	Psa.0170.B24	31	6	36
ctg15874	308	Psa.0193.P05	32	0	31
ctg16173	309	Psa.0708.K16	19	13	31
ctg16173	310	Psa.0533.H10	28	16	43
ctg16173	311	Psa.0545.E19	17	18	34
ctg16173	312	Psa.0249.D04	33	11	43
ctg16014	313	Psa.0179.B04	25	0	24
ctg15874	314	Psa.0255.D07	31	3	33
ctg4511	315	Psa.0608.G06	31	140	170
ctg4511	316	Psa.0319.D04	27	123	149
ctg4511	317	Psa.0583.P17	24	127	150
ctg4511	318	Psa.0065.G17	26	141	166
ctg4511	319	Psa.0088.C24	15	140	154
ctg4511	320	Psa.0223.E17	39	106	144
ctg4511	321	Psa.0362.P15	34	112	145
ctg5805	322	Psa.0310.P16	37	54	90
ctg5805	323	Psa.0097.B03	19	71	89
singleton	324	Psa.0220.D08	33
ctg5805	325	Psa.0239.C05	40	38	77
ctg5805	326	Psa.0147.M11	29	62	90
ctg5805	327	Psa.0194.L24	38	52	89
ctg5805	328	Psa.0721.A14	37	41	77
ctg5805	329	Psa.0595.P16	18	70	87
ctg15080	330	Psa.0223.O07	24	0	23
ctg641	331	Psa.0642.L12	16	259	274
singleton	332	Psa.0356.J09	24
ctg641	333	Psa.0321.J07	14	260	273
ctg15080	334	Psa.0115.F09	16	1	16
ctg11236	335	Psa.0144.P15	35	450	484
ctg11236	336	Psa.0087.J10	44	438	481
ctg11236	337	Psa.0162.O01	64	415	478
ctg11236	338	Psa.0198.N10	45	449	493
ctg11236	339	Psa.0377.P23	49	430	478
ctg11236	340	Psa.0280.E06	65	410	474
ctg11236	341	Psa.0304.P11	86	398	483
ctg11236	342	Psa.0435.F15	89	386	474
ctg11236	343	Psa.0322.D22	64	416	479
ctg303	344	Psa.0583.P24	32	158	189
ctg303	345	Psa.0237.A13	36	154	189
ctg2250	346	Psa.0288.O15	34	139	172
ctg2250	347	Psa.0083.A15	36	132	167
ctg5265	348	Psa.0155.L03	24	2	25
ctg5265	349	Psa.0286.D03	24	0	23
ctg5265	350	Psa.0704.J06	15	10	24
ctg5265	351	Psa.0570.B17	9	8	16
ctg2213	352	Psa.0229.G18	26	128	153
ctg2213	353	Psa.0423.G22	43	141	183
ctg2213	354	Psa.0471.F06	53	131	183
ctg2213	355	Psa.0362.A17	47	137	183
ctg2213	356	Psa.0264.O23	36	130	165
ctg2213	357	Psa.0006.N09	30	151	180
ctg2213	358	Psa.0100.G03	51	135	185
ctg2213	359	Psa.0057.C07	37	127	163
ctg14607	360	Psa.0199.H07	12	0	11
ctg14607	361	Psa.0098.L05	11	1	11
singleton	362	Psa.0178.J07	21
ctg14607	363	Psa.0698.E20	9	2	10
ctg14607	364	Psa.0391.F15	15	0	14
ctg14607	365	Psa.0704.I04	5	5	9
ctg14607	366	Psa.0556.F12	13	1	13
ctg57	367	Psa.0738.P18	45	838	882
ctg57	368	Psa.0396.P03	20	837	856
ctg57	369	Psa.0269.E19	21	842	862
ctg57	370	Psa.0477.A09	22	868	889
ctg57	371	Psa.0034.K15	26	863	888
ctg57	372	Psa.0053.I17	46	839	884
ctg57	373	Psa.0488.D22	36	856	891
ctg57	374	Psa.0075.C21	40	824	863
ctg10057	375	Psa.0753.G17	39	2	40
ctg10057	376	Psa.0307.D11	34	6	39
ctg10057	377	Psa.0250.M10	28	1	28
ctg18282	378	Psa.0751.A21	35	0	34
ctg18282	379	Psa.0388.M03	47	1	47
ctg13135	380	Psa.0051.C12	18	1	18
ctg14440	381	Psa.0487.K19	28	0	27
ctg13135	382	Psa.0723.F21	19	2	20
ctg13135	383	Psa.0225.C22	18	0	17
ctg14440	384	Psa.0092.O14	22	2	23
ctg12599	385	Psa.0353.I24	36	3	38
ctg12599	386	Psa.0419.I09	32	0	31
ctg12599	387	Psa.0427.J16	36	2	37
ctg12599	388	Psa.0036.J18	23	0	22
ctg10505	389	Psa.0398.L10	21	84	104
ctg10505	390	Psa.0522.J24	25	81	105
ctg10505	391	Psa.0413.A13	13	78	90
ctg10505	392	Psa.0741.K23	20	82	101
ctg10505	393	Psa.0271.H14	17	78	94
ctg8307	394	Psa.0323.J03	48	153	200
ctg8307	395	Psa.0243.J15	40	128	167
ctg8307	396	Psa.0282.J19	19	145	163
ctg8307	397	Psa.0535.M14	42	139	180
ctg8307	398	Psa.0236.B14	47	143	189
ctg8307	399	Psa.0598.H18	47	137	183
ctg8307	400	Psa.0278.J11	44	138	181
ctg8307	401	Psa.0111.D22	50	133	182
ctg8307	402	Psa.0627.H03	34	136	169
ctg8307	403	Psa.0490.I18	53	152	204
ctg8307	404	Psa.0190.N23	48	134	181
ctg11413	405	Psa.0245.B13	41	35	75
ctg11413	406	Psa.0034.P08	19	42	60
ctg11413	407	Psa.0162.L03	42	36	77
ctg11413	408	Psa.0125.K23	38	25	62
ctg11413	409	Psa.0110.I15	14	37	50
ctg11413	410	Psa.0181.D07	40	25	64
ctg11413	411	Psa.0261.O23	38	45	82
ctg8453	412	Psa.0739.J19	35	1	35
ctg8453	413	Psa.0031.I02	36	0	35
ctg10924	414	Psa.0121.E20	43	70	112
ctg10924	415	Psa.0234.I07	28	66	93
ctg10924	416	Psa.0622.O10	36	74	109
ctg10924	417	Psa.0452.I16	30	68	97
ctg10924	418	Psa.0633.N06	25	65	89
ctg482	419	Psa.0087.N10	10	53	62
ctg482	420	Psa.0734.I17	16	58	73
ctg482	421	Psa.0106.O07	31	65	95
ctg482	422	Psa.0477.F23	31	42	72
ctg482	423	Psa.0405.G11	24	69	92
ctg482	424	Psa.0380.B15	17	64	80
ctg10044	425	Psa.0619.B03	19	93	111
ctg10044	426	Psa.0164.H14	32	107	138
ctg10044	427	Psa.0670.O20	22	109	130
ctg10044	428	Psa.0650.L04	31	109	139
ctg10044	429	Psa.0446.O11	24	99	122
ctg10044	430	Psa.0399.B19	39	110	148
ctg10044	431	Psa.0324.F20	43	110	152
ctg10280	432	Psa.0143.M21	19	9	27
ctg10280	433	Psa.0728.E09	16	15	30
ctg861	434	Psa.0165.E04	64	220	283
ctg861	435	Psa.0687.A07	49	206	254
ctg861	436	Psa.0605.O19	49	199	247
ctg861	437	Psa.0436.G18	54	228	281
ctg861	438	Psa.0558.K13	43	228	270
ctg861	439	Psa.0708.L02	47	226	272
ctg861	440	Psa.0507.J07	61	190	250
ctg861	441	Psa.0091.C18	50	197	246
ctg15934	442	Psa.0473.I16	28	0	27
ctg13088	443	Psa.0307.B12	13	15	27
ctg13088	444	Psa.0605.I01	31	0	30
ctg15934	445	Psa.0319.A11	16	3	18
ctg15934	446	Psa.0154.P08	29	5	33
ctg15934	447	Psa.0429.K22	31	1	31
ctg542	448	Psa.0096.I06	38	2	39
ctg542	449	Psa.0639.N18	40	0	39
ctg10594	450	Psa.0335.D20	18	0	17
ctg10594	451	Psa.0543.G07	19	0	18
ctg4190	452	Psa.0302.B04	64	21	84
ctg4190	453	Psa.0447.L20	39	18	56
ctg4190	454	Psa.0557.D01	32	9	40
ctg4190	455	Psa.0699.F08	41	0	40
ctg4190	456	Psa.0288.C21	43	0	42
ctg4190	457	Psa.0724.G21	39	5	43
ctg4190	458	Psa.0106.E06	37	5	41
ctg4190	459	Psa.0624.B19	51	21	71
ctg4190	460	Psa.0713.P15	38	39	76
ctg2016	461	Psa.0293.J24	41	2	42
ctg2016	462	Psa.0198.O06	49	12	60
ctg2016	463	Psa.0673.I09	44	2	45
ctg2016	464	Psa.0223.F01	43	2	44
ctg2016	465	Psa.0595.E06	40	11	50
ctg2016	466	Psa.0399.D03	47	0	46
ctg10312	467	Psa.0615.O06	23	76	98
ctg10312	468	Psa.0037.J09	14	76	89
ctg10312	469	Psa.0128.F19	27	69	95
ctg10312	470	Psa.0316.N24	25	76	100
ctg11392	471	Psa.0287.A02	29	34	62
ctg11392	472	Psa.0663.N17	31	30	60
ctg11392	473	Psa.0719.A18	35	42	76
ctg11392	474	Psa.0404.D16	25	45	69
ctg11392	475	Psa.0230.E12	32	43	74
ctg11392	476	Psa.0211.B12	32	51	82
ctg11392	477	Psa.0389.G19	38	50	87
ctg11392	478	Psa.0309.D07	37	43	79
ctg11392	479	Psa.0412.E20	26	50	75
ctg11392	480	Psa.0072.G22	39	51	89
ctg11392	481	Psa.0489.L22	31	42	72
ctg11392	482	Psa.0168.J20	35	48	82
ctg11392	483	Psa.0235.A01	52	45	96
ctg11392	484	Psa.0513.G20	27	52	78
ctg7579	485	Psa.0338.M07	71	80	150
ctg7579	486	Psa.0734.I18	55	84	138
ctg13477	487	Psa.0610.L21	21	1	21
ctg13477	488	Psa.0444.D06	37	6	42
ctg11109	489	Psa.0762.K17	35	6	40
ctg11109	490	Psa.0765.I03	21	0	20
ctg11109	491	Psa.0754.F10	32	9	40
ctg11109	492	Psa.0386.A23	39	8	46
ctg11525	493	Psa.0368.D06	47	0	46
ctg11525	494	Psa.0237.N09	7	8	14
ctg11525	495	Psa.0405.I14	53	5	57
ctg11371	496	Psa.0641.N21	29	11	39
ctg11371	497	Psa.0191.O03	49	21	69
ctg11371	498	Psa.0445.L06	46	23	68
ctg11371	499	Psa.0117.P05	45	23	67
ctg11371	500	Psa.0666.P06	25	19	43
ctg11371	501	Psa.0673.L14	36	3	38
ctg11371	502	Psa.0172.G20	39	20	58
ctg11371	503	Psa.0478.P18	35	21	55
ctg11371	504	Psa.0264.H24	42	12	53
ctg11371	505	Psa.0694.F17	27	0	26
ctg11371	506	Psa.0245.P04	33	6	38
ctg11371	507	Psa.0074.H06	42	14	55
ctg11371	508	Psa.0290.E15	36	22	57
ctg10284	509	Psa.0431.H06	49	135	183
ctg10284	510	Psa.0472.A20	75	96	170
ctg10284	511	Psa.0469.I23	61	124	184
ctg10284	512	Psa.0766.M07	61	103	163
ctg10284	513	Psa.0002.E02	71	95	165
ctg10284	514	Psa.0410.I19	49	128	176
ctg7758	515	Psa.0702.B20	38	364	401
ctg7758	516	Psa.0247.H07	45	350	394
ctg7758	517	Psa.0458.P23	48	344	391
ctg7758	518	Psa.0347.D11	33	353	385
ctg7758	519	Psa.0139.N06	35	353	387
ctg7758	520	Psa.0432.B18	30	379	408
ctg5970	521	Psa.0300.G14	38	0	37
ctg14731	522	Psa.0102.P19	39	0	38
ctg14731	523	Psa.0270.B15	43	0	42
ctg14731	524	Psa.0701.K15	31	12	42
ctg165	525	Psa.0598.I01	34	632	665
ctg165	526	Psa.0316.P11	37	631	667
ctg165	527	Psa.0539.M14	40	640	679
ctg165	528	Psa.0479.I12	31	635	665
ctg476	529	Psa.0647.I16	24	110	133
ctg15380	530	Psa.0219.N24	22	15	36
ctg15380	531	Psa.0127.P08	32	4	35
ctg15380	532	Psa.0683.N08	34	0	33
ctg10187	533	Psa.0461.A04	53	220	272
ctg7307	534	Psa.0438.H20	43	2	44
ctg7307	535	Psa.0186.J19	26	0	25
ctg7307	536	Psa.0299.K14	26	14	39
ctg7307	537	Psa.0206.F23	41	1	41
ctg7307	538	Psa.0755.C04	22	10	31
ctg10187	539	Psa.0730.B15	43	219	261
ctg10187	540	Psa.0358.D07	18	248	265
ctg10187	541	Psa.0156.C18	45	217	261
ctg7307	542	Psa.0375.J12	31	11	41
ctg7307	543	Psa.0525.P19	27	11	37
ctg7307	544	Psa.0051.N20	19	9	27
ctg63	545	Psa.0604.B08	30	24	53
ctg63	546	Psa.0653.K10	36	17	52
ctg63	547	Psa.0549.B13	41	12	52
ctg63	548	Psa.0468.O22	42	31	72
ctg63	549	Psa.0304.N05	36	22	57
ctg63	550	Psa.0487.J23	28	32	59
ctg63	551	Psa.0629.L24	33	23	55
ctg9999	552	Psa.0118.A20	42	12	53
ctg63	553	Psa.0206.G19	28	16	43
ctg63	554	Psa.0092.B06	17	33	49
ctg9999	555	Psa.0285.A13	30	14	43
ctg63	556	Psa.0733.A05	33	0	32
ctg63	557	Psa.0379.I21	36	25	60
ctg2774	558	Psa.0200.A09	68	389	456
ctg2774	559	Psa.0602.J18	46	381	426
ctg2774	560	Psa.0537.H01	50	375	424
ctg2774	561	Psa.0453.K19	49	407	455
ctg2774	562	Psa.0627.O07	50	375	424
ctg2774	563	Psa.0542.O01	27	355	381
ctg1609	564	Psa.0558.C05	39	52	90
ctg1609	565	Psa.0121.A08	37	67	103
ctg1609	566	Psa.0072.K10	44	53	96
ctg1609	567	Psa.0747.L08	28	53	80
ctg1609	568	Psa.0359.L16	50	69	118
ctg1609	569	Psa.0106.F14	32	53	84
ctg1609	570	Psa.0214.D04	39	51	89
ctg8987	571	Psa.0197.B05	39	5	43
ctg8987	572	Psa.0699.L15	27	5	31
ctg8987	573	Psa.0423.K04	40	4	43
ctg8987	574	Psa.0146.B23	38	11	48
ctg8987	575	Psa.0537.P12	28	0	27
ctg471	576	Psa.0151.D14	37	21	57
ctg471	577	Psa.0350.F04	42	23	64
ctg471	578	Psa.0116.G17	52	38	89
ctg471	579	Psa.0251.M06	55	20	74
ctg471	580	Psa.0274.I01	43	52	94
ctg16734	581	Psa.0693.P17	44	0	43
ctg16734	582	Psa.0213.O09	46	3	48
ctg16734	583	Psa.0374.J03	50	7	56
ctg19121	584	Psa.0632.B17	40	0	39
ctg1362	585	Psa.0518.P21	43	114	156
ctg1362	586	Psa.0475.K02	63	113	175
ctg1362	587	Psa.0500.C18	55	114	168
singleton	588	Psa.0700.B22	37
ctg13042	589	Psa.0626.N13	38	0	37
ctg13042	590	Psa.0048.J09	44	5	48
singleton	591	Psa.0510.J15	43
ctg9900	592	Psa.0770.P17	49	667	715
ctg9900	593	Psa.0107.C07	56	676	731
ctg9900	594	Psa.0553.I17	53	668	720
ctg9900	595	Psa.0147.P02	48	629	676
ctg10356	596	Psa.0244.L04	57	137	193
ctg10356	597	Psa.0378.M18	36	183	218
ctg10356	598	Psa.0720.O02	9	187	195
ctg10356	599	Psa.0201.P11	43	195	237
ctg500	600	Psa.0199.E07	46	12	57
ctg500	601	Psa.0478.P14	43	21	63
ctg500	602	Psa.0599.L17	18	0	17
ctg500	603	Psa.0690.F11	24	5	28
ctg11589	604	Psa.0488.K19	19	0	18
ctg11589	605	Psa.0156.N22	20	3	22
ctg11589	606	Psa.0416.K17	17	1	17
ctg11589	607	Psa.0198.K22	46	19	64
ctg11589	608	Psa.0065.D07	20	1	20
ctg11589	609	Psa.0374.M24	17	3	19
ctg11589	610	Psa.0396.L10	11	9	19
ctg11589	611	Psa.0347.O05	22	11	32
ctg11589	612	Psa.0272.M16	24	0	23
ctg11589	613	Psa.0644.J09	16	24	39
ctg11589	614	Psa.0034.A17	23	0	22
ctg11589	615	Psa.0745.H14	21	0	20
ctg1099	616	Psa.0083.K15	53	124	176
ctg1099	617	Psa.0620.D14	37	145	181
ctg1099	618	Psa.0427.N15	63	123	185
ctg1099	619	Psa.0302.H21	64	124	187
ctg1099	620	Psa.0769.B20	33	141	173
ctg1099	621	Psa.0143.B04	39	143	181
ctg11668	622	Psa.0732.I06	17	35	51
ctg11668	623	Psa.0329.N06	49	36	84
ctg11668	624	Psa.0419.M16	49	11	59
ctg11668	625	Psa.0395.D24	49	17	65
ctg11668	626	Psa.0190.E12	46	36	81
ctg14501	627	Psa.0095.D14	31	6	36
ctg15781	628	Psa.0147.B11	39	0	38
ctg14501	629	Psa.0590.B23	32	0	31
ctg15781	630	Psa.0447.O11	37	5	41
ctg1194	631	Psa.0480.P16	35	129	163
ctg1194	632	Psa.0673.G03	43	95	137
ctg1194	633	Psa.0654.A06	29	109	137
ctg1194	634	Psa.0207.F08	46	116	161
singleton	635	Psa.0717.P08	19
ctg1194	636	Psa.0408.M05	29	110	138
ctg1194	637	Psa.0566.I17	28	112	139
ctg1194	638	Psa.0515.A12	26	111	136
ctg10708	639	Psa.0300.L07	44	286	329
ctg10708	640	Psa.0140.M07	41	252	292
ctg590	641	Psa.0450.J01	19	42	60
ctg10708	642	Psa.0513.A17	44	256	299
ctg590	643	Psa.0258.L09	25	57	81
ctg10708	644	Psa.0316.O03	48	294	341
ctg590	645	Psa.0386.P12	15	49	63
ctg10708	646	Psa.0498.G24	48	250	297
ctg590	647	Psa.0750.A07	14	48	61
ctg10708	648	Psa.0465.I23	64	272	335
ctg10708	649	Psa.0622.L24	49	253	301
ctg590	650	Psa.0369.C14	27	53	79
singleton	651	Psa.0020.F09	20
ctg14231	652	Psa.0085.D04	24	0	23
ctg14231	653	Psa.0561.G23	24	0	23
singleton	654	Psa.0645.A03	25
ctg6397	655	Psa.0521.N15	41	13	53
ctg6397	656	Psa.0460.I11	43	1	43
ctg6397	657	Psa.0566.A11	39	35	73
ctg6397	658	Psa.0702.I19	47	17	63
ctg419	659	Psa.0079.C03	36	526	561
ctg419	660	Psa.0488.P12	45	521	565
ctg419	661	Psa.0375.B06	38	531	568
singleton	662	Psa.0673.N10	41
ctg419	663	Psa.0605.B12	37	520	556
ctg419	664	Psa.0623.O18	35	522	556
ctg419	665	Psa.0562.G14	34	529	562
singleton	666	Psa.0294.N06	38
ctg10181	667	Psa.0537.N05	24	233	256
ctg10181	668	Psa.0184.H19	33	221	253
ctg10181	669	Psa.0367.P05	36	227	262
ctg10181	670	Psa.0122.D12	24	226	249
ctg504	671	Psa.0721.J10	47	69	115
ctg504	672	Psa.0133.A07	70	106	175
ctg504	673	Psa.0591.O10	43	63	105
ctg504	674	Psa.0445.L16	58	97	154
ctg504	675	Psa.0506.K12	48	108	155
ctg504	676	Psa.0149.G13	35	56	90
ctg504	677	Psa.0041.C22	58	95	152
ctg504	678	Psa.0140.C11	51	106	156
ctg504	679	Psa.0294.D16	52	97	148
ctg504	680	Psa.0207.I02	62	71	132
ctg504	681	Psa.0687.C23	50	71	120
ctg504	682	Psa.0413.A24	33	58	90
ctg504	683	Psa.0352.B18	56	62	117
ctg274	684	Psa.0552.G03	26	43	68
ctg9375	685	Psa.0560.C19	16	36	51
ctg11688	686	Psa.0267.N22	5	24	28
ctg11688	687	Psa.0038.N10	25	7	31
ctg11688	688	Psa.0034.F09	15	16	30
ctg236	689	Psa.0391.M18	67	74	140
ctg236	690	Psa.0303.N13	77	96	172
ctg236	691	Psa.0195.E08	57	107	163
ctg236	692	Psa.0681.I13	54	98	151
ctg236	693	Psa.0553.G15	65	75	139
ctg37	694	Psa.0096.A02	42	33	74
ctg37	695	Psa.0109.O24	51	15	65
ctg37	696	Psa.0099.N03	42	52	93
ctg37	697	Psa.0469.M10	73	9	81
ctg37	698	Psa.0302.D24	76	15	90
ctg37	699	Psa.0331.O20	49	42	90
singleton	700	Psa.0737.F08	48
ctg5028	701	Psa.0099.I04	19	174	192
ctg5028	702	Psa.0071.F24	28	169	196
ctg3195	703	Psa.0075.H14	32	6	37
ctg3195	704	Psa.0295.M19	18	0	17
ctg3195	705	Psa.0718.L06	25	6	30
ctg758	706	Psa.0124.B16	47	595	641
ctg758	707	Psa.0071.L15	45	585	629
ctg758	708	Psa.0311.B01	37	584	620
ctg758	709	Psa.0605.N18	36	570	605
ctg758	710	Psa.0103.M19	31	572	602
ctg758	711	Psa.0535.J14	29	596	624
ctg758	712	Psa.0096.F09	27	572	598
ctg2640	713	Psa.0474.O06	31	228	258
ctg2640	714	Psa.0248.H22	32	221	252
ctg2640	715	Psa.0358.H05	22	208	229
ctg2640	716	Psa.0138.G19	32	222	253
ctg2640	717	Psa.0338.F14	29	213	241
ctg2640	718	Psa.0693.F11	16	225	240
ctg2640	719	Psa.0533.N04	20	220	239
ctg10218	720	Psa.0683.I09	8	276	283
ctg11110	721	Psa.0449.O05	76	92	167
ctg11524	722	Psa.0145.J08	43	0	42
ctg3197	723	Psa.0600.M09	23	0	22
ctg11755	724	Psa.0541.M14	26	107	132
ctg11755	725	Psa.0569.D16	43	86	128
ctg11755	726	Psa.0746.J09	37	79	115
ctg11703	727	Psa.0076.A11	16	22	37
ctg11755	728	Psa.0470.A03	43	94	136
ctg14179	729	Psa.0478.P16	41	5	45
ctg3197	730	Psa.0511.P09	23	1	23
ctg3197	731	Psa.0585.A06	24	1	24
ctg11703	732	Psa.0200.J08	40	11	50
ctg11110	733	Psa.0194.J07	53	115	167
ctg3197	734	Psa.0133.O06	40	3	42
ctg1637	735	Psa.0513.I20	37	9	45
ctg1697	736	Psa.0721.E19	42	0	41
ctg1697	737	Psa.0311.B02	43	2	44
ctg1697	738	Psa.0686.E19	40	0	39
ctg1697	739	Psa.0612.J06	42	4	45
ctg13840	740	Psa.0172.D19	43	4	46
ctg1697	741	Psa.0570.K12	42	4	45
ctg13840	742	Psa.0071.C06	34	1	34
ctg12942	743	Psa.0437.A08	45	0	44
ctg12942	744	Psa.0123.K13	44	6	49
ctg12702	745	Psa.0462.H16	30	0	29
ctg12702	746	Psa.0039.F09	14	16	29
ctg12702	747	Psa.0401.O13	28	12	39
ctg12702	748	Psa.0073.A08	25	14	38
ctg9904	749	Psa.0374.B05	66	243	308
ctg9904	750	Psa.0278.H10	61	257	317
ctg9904	751	Psa.0551.D02	66	251	316
ctg9904	752	Psa.0604.K04	45	216	260
ctg9904	753	Psa.0444.M21	62	237	298
ctg9904	754	Psa.0701.H18	63	229	291
ctg9904	755	Psa.0302.F06	83	254	336
ctg10642	756	Psa.0727.F14	40	102	141
ctg10642	757	Psa.0069.P23	42	91	132
ctg10642	758	Psa.0023.N23	28	97	124
ctg10642	759	Psa.0440.K07	48	79	126
ctg10642	760	Psa.0325.L04	38	89	126
ctg10642	761	Psa.0712.J08	38	86	123
ctg400	762	Psa.0165.N14	27	353	379
ctg400	763	Psa.0396.P14	25	391	415
ctg400	764	Psa.0306.K10	34	355	388
ctg400	765	Psa.0246.H16	40	380	419
ctg400	766	Psa.0129.A17	39	381	419
ctg400	767	Psa.0367.B20	39	383	421
ctg400	768	Psa.0193.P21	49	368	416
ctg400	769	Psa.0212.G09	41	380	420
ctg806	770	Psa.0692.M14	32	209	240
ctg806	771	Psa.0291.C16	36	208	243
ctg4029	772	Psa.0458.H01	38	28	65
ctg4029	773	Psa.0430.F19	48	12	59
ctg4029	774	Psa.0668.P05	45	8	52
ctg4029	775	Psa.0180.N14	48	6	53
ctg4029	776	Psa.0059.H20	37	8	44
ctg989	777	Psa.0217.C17	58	150	207
ctg989	778	Psa.0058.H15	63	146	208
ctg989	779	Psa.0467.J21	18	151	168
ctg989	780	Psa.0431.F06	52	178	229
ctg989	781	Psa.0336.O14	53	156	208
ctg151	782	Psa.0060.G23	72	27	98
ctg151	783	Psa.0231.C23	41	61	101
ctg151	784	Psa.0007.P12	45	66	110
ctg151	785	Psa.0342.N23	70	40	109
ctg151	786	Psa.0196.K08	59	47	105
ctg151	787	Psa.0759.J13	52	49	100
ctg151	788	Psa.0265.D20	60	52	111
ctg151	789	Psa.0278.J17	43	80	122
ctg151	790	Psa.0313.E22	54	70	123
ctg151	791	Psa.0284.C23	25	86	110
singleton	792	Psa.0534.G06	19
ctg10262	793	Psa.0047.M10	24	316	339
ctg10262	794	Psa.0221.I08	31	325	355
ctg10262	795	Psa.0698.I04	28	315	342
ctg10262	796	Psa.0339.B05	26	309	334
ctg10262	797	Psa.0122.L12	38	295	332
ctg10262	798	Psa.0146.A18	27	324	350
ctg10262	799	Psa.0256.D21	30	307	336
ctg10262	800	Psa.0588.G22	27	314	340
ctg12097	801	Psa.0375.A14	34	0	33
ctg12097	802	Psa.0226.F12	19	22	40
ctg11079	803	Psa.0620.F12	20	23	42
ctg11079	804	Psa.0411.D12	21	23	43
ctg12097	805	Psa.0370.A03	14	26	39
ctg12097	806	Psa.0214.K05	23	19	41
ctg12097	807	Psa.0020.G20	31	8	38
ctg11079	808	Psa.0233.B21	30	0	29
ctg11079	809	Psa.0434.P03	25	13	37
ctg12097	810	Psa.0489.E04	39	0	38
ctg11079	811	Psa.0662.K10	16	14	29
ctg11079	812	Psa.0147.I04	19	19	37
ctg11079	813	Psa.0438.N14	24	0	23
singleton	814	Psa.0698.N01	16
singleton	815	Psa.0753.E16	20
ctg11079	816	Psa.0572.A04	11	30	40
ctg1763	817	Psa.0654.G02	34	257	290
ctg1763	818	Psa.0496.L19	39	264	302
ctg1763	819	Psa.0060.N03	56	272	327
ctg1763	820	Psa.0257.G04	54	275	328
ctg1763	821	Psa.0067.L04	46	248	293
ctg1763	822	Psa.0698.L16	36	256	291
ctg11141	823	Psa.0129.A08	27	0	26
ctg11141	824	Psa.0571.D21	27	1	27
ctg10175	825	Psa.0513.G16	34	11	44
ctg10175	826	Psa.0744.F11	47	32	78
ctg10175	827	Psa.0022.G02	41	10	50
ctg10175	828	Psa.0669.D06	48	35	82
ctg10175	829	Psa.0210.M23	38	37	74
ctg10175	830	Psa.0757.M06	43	13	55
ctg6474	831	Psa.0559.K18	38	6	43
ctg14119	832	Psa.0658.I01	32	3	34
ctg14119	833	Psa.0081.K02	22	9	30
ctg14119	834	Psa.0234.B07	35	4	38
ctg6474	835	Psa.0271.B01	43	0	42
ctg6474	836	Psa.0587.P24	23	3	25
ctg13703	837	Psa.0762.L15	28	11	38
ctg13703	838	Psa.0065.O20	36	1	36
singleton	839	Psa.0716.L10	30
ctg13703	840	Psa.0218.E19	36	0	35
ctg10824	841	Psa.0245.I19	37	87	123
ctg10824	842	Psa.0606.A22	19	97	115
ctg10268	843	Psa.0240.I05	38	606	643
ctg10268	844	Psa.0368.A03	45	611	655
ctg10268	845	Psa.0715.C02	35	602	636
ctg10268	846	Psa.0129.P20	24	614	637
ctg10268	847	Psa.0445.P01	57	593	649
ctg129	848	Psa.0191.C14	39	7	45
ctg129	849	Psa.0455.C07	38	10	47
ctg129	850	Psa.0538.I13	46	29	74
ctg129	851	Psa.0563.M21	40	31	70
ctg129	852	Psa.0406.D14	44	18	61
ctg129	853	Psa.0447.A02	39	0	38
ctg129	854	Psa.0679.D02	48	27	74
ctg129	855	Psa.0547.O03	32	26	57
ctg129	856	Psa.0489.B20	42	13	54
ctg129	857	Psa.0076.O05	32	23	54
ctg129	858	Psa.0321.P15	35	13	47
ctg129	859	Psa.0244.L20	47	9	55
ctg658	860	Psa.0602.C23	40	229	268
ctg658	861	Psa.0472.D09	41	226	266
ctg658	862	Psa.0380.J07	45	232	276
ctg658	863	Psa.0239.L24	32	226	257
ctg658	864	Psa.0702.H17	42	235	276
ctg658	865	Psa.0640.K13	39	235	273
ctg658	866	Psa.0418.N15	50	233	282
ctg658	867	Psa.0360.M19	34	223	256
ctg658	868	Psa.0081.K17	23	230	252
ctg658	869	Psa.0664.E13	34	215	248
ctg15650	870	Psa.0351.M21	13	6	18
ctg15650	871	Psa.0261.E15	29	3	31
ctg15650	872	Psa.0140.N04	26	6	31
ctg15650	873	Psa.0226.F14	25	9	33
ctg15650	874	Psa.0239.A11	12	25	36
ctg15650	875	Psa.0392.M01	31	0	30
ctg7473	876	Psa.0421.E10	30	142	171
ctg7473	877	Psa.0302.H14	51	132	182
ctg7473	878	Psa.0296.E08	39	121	159
ctg7473	879	Psa.0452.K02	74	75	148
ctg7473	880	Psa.0364.G10	61	86	146
ctg7473	881	Psa.0356.K09	44	143	186
ctg7473	882	Psa.0063.K09	26	132	157
ctg7473	883	Psa.0251.C19	49	103	151
ctg7473	884	Psa.0630.J08	58	91	148
ctg7473	885	Psa.0718.A08	41	144	184
ctg7473	886	Psa.0481.D10	78	86	163
ctg7473	887	Psa.0371.D09	52	98	149
ctg233	888	Psa.0106.M08	31	54	84
ctg233	889	Psa.0103.C15	30	46	75
ctg233	890	Psa.0136.G08	30	59	88
ctg233	891	Psa.0452.C08	37	48	84
ctg233	892	Psa.0254.A07	37	46	82
ctg233	893	Psa.0203.G22	33	61	93
ctg233	894	Psa.0157.K06	23	67	89
ctg233	895	Psa.0712.C17	32	53	84
ctg10261	896	Psa.0387.P14	33	10	42
ctg10261	897	Psa.0129.D24	30	8	37
ctg10261	898	Psa.0308.G23	30	12	41
ctg10261	899	Psa.0728.L18	35	0	34
ctg10261	900	Psa.0621.A13	34	3	36
ctg4394	901	Psa.0259.I15	24	22	45
ctg4394	902	Psa.0354.K04	23	0	22
ctg4394	903	Psa.0129.N02	27	20	46
ctg903	904	Psa.0139.B01	34	81	114
ctg903	905	Psa.0223.H04	35	78	112
ctg4394	906	Psa.0705.G19	22	4	25
ctg9900	907	Psa.0167.D05	31	77	107
ctg2519	908	Psa.0253.M19	33	0	32
ctg2001	909	Psa.0499.E20	65	9	73
ctg2001	910	Psa.0201.O11	57	3	59
ctg2001	911	Psa.0162.J03	53	0	52
ctg8496	912	Psa.0183.C13	32	1	32
ctg8496	913	Psa.0158.B09	34	0	33
ctg8496	914	Psa.0650.F12	26	8	33
ctg8496	915	Psa.0416.O10	29	35	63
ctg8496	916	Psa.0150.I18	25	1	25
ctg8496	917	Psa.0439.C20	45	18	62
ctg10228	918	Psa.0047.K06	52	155	206
ctg10228	919	Psa.0170.B01	56	149	204
ctg10228	920	Psa.0538.L10	47	152	198
ctg1057	921	Psa.0111.K18	26	24	49
ctg1057	922	Psa.0220.G15	14	25	38
ctg1057	923	Psa.0454.L24	45	33	77
ctg1057	924	Psa.0185.M20	31	30	60
ctg397	925	Psa.0279.M18	39	288	326
ctg397	926	Psa.0450.H23	33	282	314
ctg397	927	Psa.0168.D12	36	280	315
ctg397	928	Psa.0308.L15	34	282	315
ctg397	929	Psa.0289.G22	36	281	316
ctg397	930	Psa.0143.C04	26	284	309
singleton	931	Psa.0250.P10	24
ctg397	932	Psa.0235.N21	39	279	317
ctg427	933	Psa.0224.L05	32	321	352
ctg427	934	Psa.0684.J17	32	341	372
ctg427	935	Psa.0631.H06	31	328	358
ctg427	936	Psa.0622.G22	24	335	358
ctg427	937	Psa.0074.F06	42	350	391
ctg427	938	Psa.0119.J15	30	331	360
ctg427	939	Psa.0484.O07	46	313	358
ctg427	940	Psa.0258.J18	27	346	372
ctg10056	941	Psa.0320.D23	46	0	45
ctg10056	942	Psa.0325.L21	42	0	41
ctg14151	943	Psa.0082.L04	36	4	39
ctg14151	944	Psa.0395.I04	32	0	31
ctg3502	945	Psa.0251.D21	53	185	237
ctg3502	946	Psa.0470.E03	41	210	250
ctg3502	947	Psa.0091.J18	27	223	249
ctg637	948	Psa.0032.B11	36	94	129
ctg637	949	Psa.0761.K17	26	108	133
ctg637	950	Psa.0654.P21	36	90	125
ctg637	951	Psa.0603.E09	30	111	140
ctg11068	952	Psa.0463.O19	28	4	31
ctg637	953	Psa.0406.C02	24	105	128
ctg11068	954	Psa.0502.A02	28	3	30
ctg11068	955	Psa.0253.B19	31	1	31
ctg637	956	Psa.0627.O09	33	98	130
ctg8243	957	Psa.0659.P09	23	29	51
ctg637	958	Psa.0445.H03	36	113	148
ctg785	959	Psa.0132.K14	47	74	120
ctg785	960	Psa.0176.A11	47	59	105
ctg785	961	Psa.0612.P14	45	48	92
ctg785	962	Psa.0586.P22	13	78	90
ctg13384	963	Psa.0485.E18	38	9	46
ctg13384	964	Psa.0057.G22	38	7	44
ctg12536	965	Psa.0279.P11	39	4	42
ctg13384	966	Psa.0407.F22	39	3	41
ctg13384	967	Psa.0391.A10	35	12	46
ctg12536	968	Psa.0452.N09	47	0	46
ctg13384	969	Psa.0614.C09	36	0	35
ctg12536	970	Psa.0723.J03	36	12	47
ctg12536	971	Psa.0200.B10	57	3	59
ctg12536	972	Psa.0035.C18	45	12	56
ctg13384	973	Psa.0379.F18	38	11	48
ctg13	974	Psa.0242.H21	28	19	46
ctg13	975	Psa.0222.H08	32	3	34
ctg13	976	Psa.0111.I03	35	20	54
ctg13	977	Psa.0260.H12	25	20	44
ctg13	978	Psa.0187.O05	48	0	47
ctg13	979	Psa.0336.O02	35	23	57
ctg4126	980	Psa.0628.M24	27	170	196
ctg4126	981	Psa.0511.B10	29	170	198
ctg4126	982	Psa.0258.L14	37	156	192
ctg4126	983	Psa.0227.P14	39	152	190
ctg7678	984	Psa.0335.J05	43	400	442
ctg7678	985	Psa.0470.F08	54	420	473
ctg12942	986	Psa.0045.L24	35	19	53
ctg15410	987	Psa.0691.O16	6	0	5
ctg17087	988	Psa.0239.C03	32	5	36
ctg17087	989	Psa.0705.H18	23	0	22
ctg17087	990	Psa.0384.F03	21	4	24
ctg17087	991	Psa.0440.M22	31	8	38
ctg17087	992	Psa.0601.A09	20	2	21
ctg16379	993	Psa.0201.C08	50	0	49
ctg7297	994	Psa.0447.E23	47	29	75
ctg16379	995	Psa.0414.D22	29	19	47
ctg16379	996	Psa.0184.F01	27	23	49
ctg16379	997	Psa.0471.G15	33	15	47
ctg16379	998	Psa.0302.P08	27	18	44
ctg16379	999	Psa.0707.D08	32	18	49
singleton	1000	Psa.0291.K20	15
ctg627	1001	Psa.0483.B13	56	110	165
ctg627	1002	Psa.0117.I19	48	80	127
ctg627	1003	Psa.0176.H09	32	126	157
ctg627	1004	Psa.0238.G03	33	122	154
ctg627	1005	Psa.0626.K06	38	95	132
ctg627	1006	Psa.0385.N10	37	99	135
ctg7463	1007	Psa.0589.I12	60	165	224
ctg7463	1008	Psa.0626.J18	56	162	217
ctg7463	1009	Psa.0484.I04	72	141	212
ctg7463	1010	Psa.0518.M17	57	166	222
ctg7463	1011	Psa.0538.P05	55	162	216
ctg7463	1012	Psa.0743.H22	62	159	220
ctg7463	1013	Psa.0334.J21	60	161	220
ctg10531	1014	Psa.0509.P02	40	42	81
ctg10531	1015	Psa.0365.L16	35	49	83
ctg10531	1016	Psa.0166.H13	37	47	83
ctg10531	1017	Psa.0433.L23	43	42	84
ctg10531	1018	Psa.0311.H12	41	40	80
ctg1676	1019	Psa.0159.K16	30	0	29
ctg11654	1020	Psa.0275.K12	10	227	236
ctg11654	1021	Psa.0161.H22	54	205	258
ctg5	1022	Psa.0510.L14	55	0	54
ctg10860	1023	Psa.0428.G15	22	24	45
ctg10860	1024	Psa.0652.C07	26	7	32
ctg10860	1025	Psa.0750.G04	29	4	32
ctg10860	1026	Psa.0530.P19	15	34	48
ctg10860	1027	Psa.0390.K04	33	13	45
ctg10860	1028	Psa.0412.A18	32	0	31
ctg1358	1029	Psa.0405.K20	41	42	82
ctg1358	1030	Psa.0723.M10	47	24	70
ctg1358	1031	Psa.0746.P06	52	31	82
ctg1358	1032	Psa.0663.I08	42	23	64
ctg1358	1033	Psa.0474.M15	49	37	85
ctg1358	1034	Psa.0716.N17	48	17	64
ctg1358	1035	Psa.0416.I15	30	33	62
ctg1358	1036	Psa.0436.O07	51	13	63
ctg1358	1037	Psa.0296.J11	45	29	73
ctg2011	1038	Psa.0662.F20	24	41	64
ctg2011	1039	Psa.0341.M24	45	22	66
ctg2011	1040	Psa.0318.L05	48	10	57
ctg2011	1041	Psa.0491.O02	41	9	49
ctg2011	1042	Psa.0188.A24	45	10	54
ctg312	1043	Psa.0097.L08	25	179	203
ctg312	1044	Psa.0553.C14	29	172	200
ctg312	1045	Psa.0619.J02	27	167	193
ctg312	1046	Psa.0727.C08	28	189	216
ctg312	1047	Psa.0358.G21	29	168	196
ctg312	1048	Psa.0183.P22	32	181	212
ctg312	1049	Psa.0341.G13	30	185	214
ctg312	1050	Psa.0489.N17	28	184	211
ctg13324	1051	Psa.0056.C16	39	3	41
ctg14785	1052	Psa.0104.F15	38	0	37
ctg13324	1053	Psa.0168.E04	36	0	35
ctg13324	1054	Psa.0140.D15	35	5	39
ctg13324	1055	Psa.0646.I03	38	4	41
ctg13324	1056	Psa.0114.C12	38	4	41
ctg13324	1057	Psa.0644.C14	43	0	42
ctg1423	1058	Psa.0116.A11	43	77	119
ctg1423	1059	Psa.0524.F08	36	98	133
ctg1423	1060	Psa.0277.D08	35	104	138
ctg1423	1061	Psa.0079.P10	46	83	128
ctg1423	1062	Psa.0425.M20	36	103	138
ctg1423	1063	Psa.0557.L22	40	97	136
ctg1751	1064	Psa.0508.H02	50	279	328
ctg1751	1065	Psa.0449.D06	55	285	339
ctg1751	1066	Psa.0120.J03	41	308	348
ctg1751	1067	Psa.0742.J23	15	318	332
ctg1751	1068	Psa.0770.N07	47	306	352
ctg1751	1069	Psa.0048.F16	32	304	335
ctg11252	1070	Psa.0178.O04	54	203	256
ctg11252	1071	Psa.0738.N13	43	203	245
ctg11252	1072	Psa.0621.A06	40	200	239
ctg11252	1073	Psa.0098.L08	13	227	239
ctg3108	1074	Psa.0356.G21	32	63	94
ctg3108	1075	Psa.0710.H12	44	50	93
ctg793	1076	Psa.0440.L05	37	20	56
ctg793	1077	Psa.0341.D22	39	20	58
ctg793	1078	Psa.0717.E15	55	53	107
ctg793	1079	Psa.0518.N06	44	33	76
ctg793	1080	Psa.0543.K16	49	29	77
ctg793	1081	Psa.0101.E12	35	19	53
ctg793	1082	Psa.0582.C14	23	82	104
ctg793	1083	Psa.0303.F24	24	31	54
ctg791	1084	Psa.0592.H09	42	252	293
ctg11767	1085	Psa.0299.E04	55	14	68
ctg11767	1086	Psa.0331.K10	12	27	38
ctg11767	1087	Psa.0591.P12	28	6	33
ctg11767	1088	Psa.0189.A17	63	9	71
ctg11767	1089	Psa.0677.H21	20	0	19
ctg11767	1090	Psa.0665.K12	42	13	54
ctg584	1091	Psa.0402.F15	31	64	94
ctg584	1092	Psa.0158.N23	21	50	70
ctg584	1093	Psa.0498.K03	13	60	72
ctg584	1094	Psa.0244.I05	27	66	92
ctg584	1095	Psa.0648.I24	10	60	69
ctg403	1096	Psa.0382.D14	36	40	75
ctg2866	1097	Psa.0140.A09	28	98	125
ctg1156	1098	Psa.0376.P19	24	399	422
ctg2866	1099	Psa.0361.D22	32	69	100
ctg403	1100	Psa.0770.O18	25	39	63
ctg4109	1101	Psa.0214.A10	48	124	171
ctg4109	1102	Psa.0122.O04	33	145	177
ctg4109	1103	Psa.0518.J04	23	167	189
ctg1928	1104	Psa.0239.J09	32	0	31
singleton	1105	Psa.0485.C06	26
ctg8584	1106	Psa.0490.O14	45	25	69
ctg8584	1107	Psa.0291.F24	34	33	66
singleton	1108	Psa.0438.G05	44
ctg8584	1109	Psa.0168.L16	46	0	45
ctg8584	1110	Psa.0201.N17	33	43	75
ctg8584	1111	Psa.0149.F18	29	37	65
ctg8584	1112	Psa.0324.M21	36	32	67
ctg8584	1113	Psa.0732.C14	32	38	69
ctg10123	1114	Psa.0257.N12	24	112	135
ctg10123	1115	Psa.0635.N24	21	107	127
ctg10123	1116	Psa.0414.N24	16	118	133
ctg10123	1117	Psa.0493.J17	42	117	158
ctg10123	1118	Psa.0483.G06	24	103	126
ctg10123	1119	Psa.0650.L18	19	107	125
ctg10123	1120	Psa.0211.O01	17	104	120
ctg4977	1121	Psa.0365.C18	29	218	246
ctg4977	1122	Psa.0186.P15	21	247	267
ctg4977	1123	Psa.0428.I22	51	209	259
ctg4977	1124	Psa.0452.A10	46	221	266
ctg1034	1125	Psa.0632.D05	21	129	149
ctg1034	1126	Psa.0277.C22	45	104	148
ctg1034	1127	Psa.0689.J22	33	114	146
ctg18917	1128	Psa.0545.O08	27	0	26
ctg14711	1129	Psa.0111.P23	34	5	38
ctg14711	1130	Psa.0139.G01	46	7	52
ctg14711	1131	Psa.0439.C13	36	1	36
ctg14711	1132	Psa.0503.A16	27	2	28
ctg18917	1133	Psa.0687.D02	23	2	24
ctg18917	1134	Psa.0684.E08	12	0	11
ctg14711	1135	Psa.0704.G03	32	1	32
ctg10219	1136	Psa.0477.G18	34	5	38
ctg10219	1137	Psa.0036.C12	22	0	21
ctg10219	1138	Psa.0108.F24	20	1	20
ctg11413	1139	Psa.0396.E13	19	52	70
ctg11413	1140	Psa.0417.E17	16	47	62
ctg8951	1141	Psa.0439.N13	39	60	98
ctg8951	1142	Psa.0549.J10	38	38	75
ctg8951	1143	Psa.0102.G23	39	65	103
singleton	1144	Psa.0267.H15	45
ctg10907	1145	Psa.0584.H10	52	34	85
ctg10907	1146	Psa.0138.B12	66	7	72
ctg10907	1147	Psa.0284.O14	54	32	85
ctg10907	1148	Psa.0261.O18	37	14	50
ctg10907	1149	Psa.0561.L02	51	30	80
ctg10907	1150	Psa.0646.D09	53	32	84
ctg5541	1151	Psa.0710.L03	35	45	79
ctg898	1152	Psa.0653.D12	24	50	73
ctg5541	1153	Psa.0488.D17	30	32	61
ctg898	1154	Psa.0101.C17	14	71	84
ctg898	1155	Psa.0585.F14	23	51	73
ctg5541	1156	Psa.0464.O05	44	35	78
ctg5541	1157	Psa.0430.B22	53	53	105
ctg5541	1158	Psa.0182.H09	46	57	102
ctg5541	1159	Psa.0387.L14	34	54	87
ctg898	1160	Psa.0174.O14	16	61	76
ctg5541	1161	Psa.0077.B24	43	34	76
ctg5541	1162	Psa.0249.H02	39	26	64
ctg5541	1163	Psa.0121.H05	37	48	84
ctg10232	1164	Psa.0121.L23	21	77	97
ctg10232	1165	Psa.0493.N07	28	88	115
ctg10232	1166	Psa.0295.L10	22	75	96
ctg10232	1167	Psa.0649.B11	19	93	111
ctg10232	1168	Psa.0673.F04	21	84	104
ctg10232	1169	Psa.0616.A11	28	87	114
ctg10232	1170	Psa.0354.P22	21	77	97
ctg10232	1171	Psa.0708.L18	19	84	102
ctg10232	1172	Psa.0735.H12	18	84	101
ctg563	1173	Psa.0266.O14	27	43	69
ctg563	1174	Psa.0229.M10	19	64	82
ctg563	1175	Psa.0622.G06	23	52	74
ctg563	1176	Psa.0466.L11	28	52	79
ctg563	1177	Psa.0764.D17	24	79	102
ctg7917	1178	Psa.0477.N01	12	66	77
singleton	1179	Psa.0378.C09	22
ctg7917	1180	Psa.0448.M09	40	64	103
ctg7917	1181	Psa.0466.H08	36	66	101
ctg7917	1182	Psa.0605.M15	27	64	90
ctg7917	1183	Psa.0254.F12	36	58	93
ctg7917	1184	Psa.0364.M23	25	51	75
ctg7917	1185	Psa.0740.C01	35	68	102
ctg7917	1186	Psa.0393.A14	36	41	76
ctg1610	1187	Psa.0303.J19	37	528	564
ctg1610	1188	Psa.0618.M18	36	522	557
ctg1610	1189	Psa.0231.I17	32	532	563
ctg78	1190	Psa.0195.I24	70	118	187
ctg3991	1191	Psa.0204.F20	48	2	49
ctg205	1192	Psa.0513.G03	37	182	218
ctg78	1193	Psa.0565.P03	31	111	141
ctg78	1194	Psa.0115.C18	58	102	159
ctg205	1195	Psa.0461.B23	37	207	243
ctg78	1196	Psa.0707.I18	45	139	183
ctg3991	1197	Psa.0679.O06	38	0	37
ctg10154	1198	Psa.0098.N12	42	350	391
ctg10154	1199	Psa.0411.J20	47	341	387
ctg3590	1200	Psa.0485.D06	35	153	187
singleton	1201	Psa.0212.J23	31
ctg3590	1202	Psa.0434.K12	27	144	170
ctg3590	1203	Psa.0553.C13	28	154	181
ctg3590	1204	Psa.0112.K17	25	158	182
ctg12763	1205	Psa.0465.P06	23	0	22
ctg12763	1206	Psa.0040.M04	29	3	31
ctg11603	1207	Psa.0756.H13	36	0	35
ctg18410	1208	Psa.0560.L19	20	0	19
ctg11525	1209	Psa.0544.K05	38	173	210
ctg11525	1210	Psa.0716.M24	55	157	211
ctg11525	1211	Psa.0248.O15	45	184	228
ctg11525	1212	Psa.0482.P14	59	152	210
ctg11525	1213	Psa.0713.F23	44	181	224
ctg17620	1214	Psa.0293.M21	39	3	41
singleton	1215	Psa.0618.O11	30
ctg17620	1216	Psa.0407.C18	39	0	38
ctg9474	1217	Psa.0073.J06	30	356	385
ctg8147	1218	Psa.0542.A05	18	78	95
ctg9474	1219	Psa.0621.L09	34	358	391
ctg8147	1220	Psa.0369.G01	12	87	98
ctg8147	1221	Psa.0096.H03	21	88	108
ctg8147	1222	Psa.0672.A02	15	88	102
ctg8147	1223	Psa.0119.K10	18	85	102
ctg8147	1224	Psa.0431.N03	41	87	127
ctg9474	1225	Psa.0427.F14	36	358	393
ctg8147	1226	Psa.0716.N09	18	78	95
ctg8147	1227	Psa.0358.H03	24	90	113
ctg8147	1228	Psa.0453.L23	19	87	105
ctg9474	1229	Psa.0384.J09	36	358	393
ctg9474	1230	Psa.0639.F06	32	357	388
ctg8147	1231	Psa.0311.N09	33	61	93
ctg8147	1232	Psa.0683.C10	20	89	108
ctg2103	1233	Psa.0502.O24	26	36	61
ctg2103	1234	Psa.0095.B05	22	20	41
ctg2103	1235	Psa.0422.H19	11	34	44
ctg2103	1236	Psa.0257.K20	26	20	45
ctg2103	1237	Psa.0366.N23	19	27	45
ctg2103	1238	Psa.0029.H23	10	24	33
ctg10187	1239	Psa.0476.F24	36	494	529
ctg10187	1240	Psa.0622.P04	25	501	525
ctg10187	1241	Psa.0546.A24	25	500	524
ctg10187	1242	Psa.0505.B17	37	465	501
ctg10187	1243	Psa.0469.G21	24	486	509
ctg10194	1244	Psa.0258.L05	34	12	45
ctg10194	1245	Psa.0181.L11	43	3	45
ctg10194	1246	Psa.0697.B03	30	10	39
ctg216	1247	Psa.0370.E10	18	82	99
ctg216	1248	Psa.0530.P06	29	84	112
ctg216	1249	Psa.0422.D11	43	67	109
ctg216	1250	Psa.0299.O13	50	102	151
ctg216	1251	Psa.0144.E22	48	59	106
ctg216	1252	Psa.0118.I19	47	60	106
ctg216	1253	Psa.0246.E14	51	103	153
ctg216	1254	Psa.0630.B16	22	103	124
ctg4572	1255	Psa.0159.G16	50	100	149
ctg4572	1256	Psa.0181.K15	24	114	137
ctg4572	1257	Psa.0672.H06	39	95	133
ctg4572	1258	Psa.0428.J21	48	108	155
ctg425	1259	Psa.0472.I19	18	45	62
ctg425	1260	Psa.0087.E23	31	58	88
ctg425	1261	Psa.0690.D03	37	56	92
ctg425	1262	Psa.0522.D23	20	53	72
ctg2177	1263	Psa.0071.H08	44	4	47
ctg2177	1264	Psa.0623.K03	40	7	46
ctg2177	1265	Psa.0291.D11	52	0	51
ctg1525	1266	Psa.0310.E19	19	75	93
ctg1525	1267	Psa.0148.P01	40	61	100
ctg11640	1268	Psa.0110.K20	44	13	56
ctg11640	1269	Psa.0449.E18	35	43	77
ctg11640	1270	Psa.0769.J05	56	13	68
ctg11640	1271	Psa.0381.O09	36	27	62
ctg11640	1272	Psa.0093.B14	42	34	75
ctg11640	1273	Psa.0210.L18	36	38	73
ctg11640	1274	Psa.0216.H06	57	14	70
ctg11640	1275	Psa.0393.K10	36	39	74
ctg11640	1276	Psa.0481.J07	59	11	69
ctg2574	1277	Psa.0235.F17	56	264	319
ctg2574	1278	Psa.0490.O04	51	269	319
ctg503	1279	Psa.0231.F11	59	184	242
ctg503	1280	Psa.0252.J01	56	168	223
ctg503	1281	Psa.0759.F14	50	180	229
ctg503	1282	Psa.0269.O22	51	168	218
ctg503	1283	Psa.0644.I11	45	164	208
ctg503	1284	Psa.0202.N07	39	159	197
ctg503	1285	Psa.0749.E10	33	180	212
ctg1851	1286	Psa.0622.O06	25	116	140
ctg1851	1287	Psa.0471.B18	34	128	161
ctg1851	1288	Psa.0005.C13	40	96	135
ctg1851	1289	Psa.0437.D19	53	100	152
ctg510	1290	Psa.0172.D24	42	12	53
ctg510	1291	Psa.0545.C14	32	46	77
ctg510	1292	Psa.0243.F02	47	37	83
ctg510	1293	Psa.0489.F03	28	36	63
ctg510	1294	Psa.0643.M09	36	15	50
ctg510	1295	Psa.0333.O02	32	23	54
ctg510	1296	Psa.0528.F02	26	37	62
ctg510	1297	Psa.0480.P17	52	0	51
ctg510	1298	Psa.0075.E17	41	44	84
ctg510	1299	Psa.0223.C12	26	34	59
ctg510	1300	Psa.0103.F02	24	36	59
ctg11007	1301	Psa.0242.C20	46	77	122
ctg11007	1302	Psa.0150.N11	39	39	77
ctg11007	1303	Psa.0759.A20	32	42	73
ctg11007	1304	Psa.0358.P22	45	49	93
ctg11007	1305	Psa.0680.P19	41	59	99
ctg11007	1306	Psa.0639.G02	33	84	116
ctg11007	1307	Psa.0065.P16	59	36	94
ctg11007	1308	Psa.0396.P09	24	90	113
ctg11007	1309	Psa.0347.F07	48	47	94
ctg11007	1310	Psa.0421.A07	28	73	100
ctg11007	1311	Psa.0232.I04	42	60	101
ctg10858	1312	Psa.0277.M01	45	131	175
ctg10858	1313	Psa.0570.M23	51	156	206
ctg10858	1314	Psa.0714.G20	34	131	164
ctg10858	1315	Psa.0479.H05	52	126	177
ctg10858	1316	Psa.0320.D06	48	139	186
ctg10858	1317	Psa.0368.J19	23	117	139
ctg10858	1318	Psa.0050.H22	45	142	186
ctg10858	1319	Psa.0039.M18	45	128	172
ctg7971	1320	Psa.0754.N18	29	128	156
ctg7971	1321	Psa.0130.G21	24	117	140
ctg7971	1322	Psa.0291.G11	36	118	153
ctg7971	1323	Psa.0084.I05	31	123	153
ctg7971	1324	Psa.0541.F14	24	117	140
ctg7971	1325	Psa.0437.G03	35	102	136
ctg7971	1326	Psa.0684.L13	27	115	141
ctg7971	1327	Psa.0511.F14	33	122	154
ctg7971	1328	Psa.0715.C08	35	130	164
ctg3789	1329	Psa.0560.H06	49	39	87
ctg3789	1330	Psa.0243.B06	57	10	66
ctg3789	1331	Psa.0457.K09	50	3	52
ctg3789	1332	Psa.0118.O16	46	2	47
ctg18365	1333	Psa.0419.K20	39	0	38
singleton	1334	Psa.0717.A02	41
singleton	1335	Psa.0383.A10	29
ctg17022	1336	Psa.0680.A06	42	3	44
ctg17027	1337	Psa.0408.P05	30	0	29
ctg13254	1338	Psa.0295.K01	41	6	46
ctg10387	1339	Psa.0037.E08	21	123	143
ctg10387	1340	Psa.0159.E19	17	127	143
ctg10387	1341	Psa.0710.N07	13	124	136
ctg10387	1342	Psa.0224.D07	17	122	138
ctg10387	1343	Psa.0256.M12	19	125	143
ctg10387	1344	Psa.0120.O16	16	118	133
ctg10387	1345	Psa.0673.E02	13	131	143
ctg10387	1346	Psa.0764.M21	17	117	133
ctg10387	1347	Psa.0108.I06	14	122	135
ctg10387	1348	Psa.0353.N15	12	124	135
ctg10387	1349	Psa.0688.F21	18	130	147
ctg10387	1350	Psa.0349.H20	16	125	140
ctg10387	1351	Psa.0447.F16	32	104	135
ctg7758	1352	Psa.0240.E23	26	486	511
ctg7758	1353	Psa.0424.L19	37	461	497
ctg7758	1354	Psa.0131.K19	35	475	509
ctg7758	1355	Psa.0412.A12	38	450	487
ctg7758	1356	Psa.0126.J04	33	460	492
ctg7758	1357	Psa.0740.F20	35	462	496
ctg7758	1358	Psa.0325.C23	37	477	513
ctg10307	1359	Psa.0083.B06	32	82	113
singleton	1360	Psa.0238.P03	29
ctg10756	1361	Psa.0419.H19	11	37	47
ctg10756	1362	Psa.0490.F24	12	38	49
ctg10756	1363	Psa.0379.D15	9	34	42
ctg10756	1364	Psa.0043.F10	10	36	45
ctg10756	1365	Psa.0462.K18	10	31	40
ctg10756	1366	Psa.0503.F05	12	36	47
ctg10756	1367	Psa.0077.D10	10	37	46
ctg10756	1368	Psa.0249.D17	12	34	45
ctg16156	1369	Psa.0328.I06	32	1	32
ctg16156	1370	Psa.0168.L02	39	3	41
ctg16156	1371	Psa.0600.P11	39	0	38
ctg1686	1372	Psa.0471.B19	34	249	282
ctg1686	1373	Psa.0494.M14	22	263	284
ctg1686	1374	Psa.0143.L19	21	262	282
ctg1686	1375	Psa.0764.N08	17	262	278
ctg1686	1376	Psa.0308.F14	26	254	279
ctg1686	1377	Psa.0033.N17	11	276	286
ctg1686	1378	Psa.0272.O16	42	257	298
ctg1686	1379	Psa.0555.I03	26	267	292
ctg1686	1380	Psa.0628.N10	27	264	290
ctg1686	1381	Psa.0609.E16	21	261	281
ctg3218	1382	Psa.0138.K11	33	53	85
ctg3218	1383	Psa.0164.H24	28	58	85
ctg3218	1384	Psa.0730.E11	20	54	73
ctg3218	1385	Psa.0255.O22	32	67	98
ctg3218	1386	Psa.0199.C10	33	54	86
ctg3218	1387	Psa.0319.I22	25	56	80
ctg3218	1388	Psa.0668.H16	34	67	100
ctg3218	1389	Psa.0112.F24	27	67	93
ctg3218	1390	Psa.0489.N03	23	54	76
ctg3218	1391	Psa.0480.G20	40	66	105
ctg3218	1392	Psa.0405.L04	17	62	78
ctg4738	1393	Psa.0491.K04	16	41	56
ctg4738	1394	Psa.0057.D06	48	10	57
ctg4738	1395	Psa.0502.A12	18	39	56
ctg4738	1396	Psa.0321.J18	20	37	56
ctg393	1397	Psa.0750.H03	19	111	129
ctg393	1398	Psa.0728.G03	24	106	129
ctg393	1399	Psa.0419.J02	22	108	129
ctg393	1400	Psa.0598.F03	18	110	127
ctg393	1401	Psa.0561.M16	23	100	122
ctg393	1402	Psa.0377.E07	22	106	127
ctg393	1403	Psa.0231.J02	23	85	107
ctg5424	1404	Psa.0566.F04	38	111	148
ctg5424	1405	Psa.0430.D04	48	78	125
ctg5424	1406	Psa.0687.E13	25	97	121
ctg5424	1407	Psa.0609.E13	19	94	112
ctg5424	1408	Psa.0769.J12	33	109	141
ctg312	1409	Psa.0373.K04	30	206	235
ctg312	1410	Psa.0090.C24	31	221	251
ctg2720	1411	Psa.0458.K14	32	185	216
ctg2720	1412	Psa.0531.B17	23	175	197
ctg2720	1413	Psa.0074.D23	32	176	207
ctg2720	1414	Psa.0318.E11	17	183	199
ctg2720	1415	Psa.0188.E06	37	178	214
ctg9405	1416	Psa.0361.K09	22	116	137
ctg2720	1417	Psa.0282.O19	28	178	205
ctg17643	1418	Psa.0765.K24	33	1	33
ctg2720	1419	Psa.0228.E17	23	179	201
singleton	1420	Psa.0535.O10	30
ctg9405	1421	Psa.0727.O07	33	113	145
ctg17643	1422	Psa.0380.K21	40	2	41
ctg750	1423	Psa.0517.F14	34	348	381
ctg2720	1424	Psa.0428.C15	18	181	198
ctg17643	1425	Psa.0311.F03	48	0	47
ctg11746	1426	Psa.0199.A06	22	4	25
ctg10451	1427	Psa.0084.A24	20	162	181
ctg10087	1428	Psa.0035.G14	57	38	94
ctg10087	1429	Psa.0737.E05	34	91	124
ctg10087	1430	Psa.0046.P03	40	88	127
ctg10087	1431	Psa.0302.A23	48	63	110
ctg10087	1432	Psa.0375.I21	47	90	136
ctg10087	1433	Psa.0223.O04	47	57	103
ctg11483	1434	Psa.0438.K07	52	131	182
ctg227	1435	Psa.0163.F13	30	40	69
ctg227	1436	Psa.0327.I24	30	45	74
ctg11483	1437	Psa.0635.O03	31	91	121
ctg11483	1438	Psa.0289.G11	73	56	128
ctg11483	1439	Psa.0051.I22	40	95	134
singleton	1440	Psa.0377.E21	39
ctg11483	1441	Psa.0131.K14	51	65	115
ctg11483	1442	Psa.0405.D24	55	56	110
singleton	1443	Psa.0560.J10	29
ctg227	1444	Psa.0485.P02	48	49	96
ctg11483	1445	Psa.0679.O02	54	52	105
ctg2405	1446	Psa.0499.B09	24	126	149
ctg2405	1447	Psa.0288.D06	33	138	170
ctg2405	1448	Psa.0505.I20	28	121	148
ctg2405	1449	Psa.0255.O21	26	131	156
ctg2405	1450	Psa.0480.M20	34	138	171
ctg2405	1451	Psa.0693.I07	34	137	170
ctg2405	1452	Psa.0227.B21	27	142	168
ctg2896	1453	Psa.0671.H20	33	47	79
ctg2896	1454	Psa.0652.K17	31	47	77
ctg2896	1455	Psa.0198.C12	16	62	77
ctg2896	1456	Psa.0172.J11	18	61	78
ctg2896	1457	Psa.0630.E01	30	50	79
ctg2896	1458	Psa.0479.K15	44	21	64
ctg595	1459	Psa.0614.M13	36	21	56
ctg2428	1460	Psa.0569.N13	35	44	78
ctg595	1461	Psa.0256.K20	37	20	56
ctg595	1462	Psa.0513.J12	34	22	55
ctg2428	1463	Psa.0441.A06	46	23	68
ctg595	1464	Psa.0736.I20	29	25	53
ctg2428	1465	Psa.0753.H24	5	57	61
ctg2428	1466	Psa.0049.E19	32	42	73
ctg2428	1467	Psa.0114.M09	41	46	86
ctg2428	1468	Psa.0292.D21	30	45	74
ctg290	1469	Psa.0442.F23	49	682	730
ctg290	1470	Psa.0494.O19	62	642	703
ctg290	1471	Psa.0251.A08	44	641	684
ctg290	1472	Psa.0413.N07	30	674	703
ctg17018	1473	Psa.0520.C04	14	3	16
ctg17018	1474	Psa.0232.M04	21	0	20
singleton	1475	Psa.0673.K15	22
ctg10104	1476	Psa.0416.A12	49	172	220
ctg10104	1477	Psa.0136.J17	47	181	227
ctg10104	1478	Psa.0503.F08	73	145	217
ctg10104	1479	Psa.0065.L17	38	192	229
ctg10104	1480	Psa.0474.M13	50	173	222
ctg10104	1481	Psa.0152.J05	15	213	227
ctg10104	1482	Psa.0348.H22	41	186	226
singleton	1483	Psa.0237.A06	35
ctg4127	1484	Psa.0459.H05	50	119	168
ctg4127	1485	Psa.0169.G17	46	138	183
ctg4127	1486	Psa.0672.E12	64	141	204
ctg4127	1487	Psa.0369.A14	26	140	165
ctg4127	1488	Psa.0689.O21	44	144	187
ctg4127	1489	Psa.0116.H07	39	170	208
ctg4127	1490	Psa.0444.J08	68	123	190
ctg14254	1491	Psa.0086.A11	18	10	27
ctg14254	1492	Psa.0612.G24	23	1	23
ctg14254	1493	Psa.0542.B23	19	12	30
ctg14254	1494	Psa.0172.F04	19	12	30
ctg14254	1495	Psa.0148.L03	18	9	26
ctg14254	1496	Psa.0618.N07	24	0	23
ctg3197	1497	Psa.0433.I03	19	22	40
ctg3197	1498	Psa.0391.E14	37	20	56
ctg3197	1499	Psa.0674.P19	35	21	55
ctg3197	1500	Psa.0087.C04	5	35	39
ctg3197	1501	Psa.0313.N17	26	33	58
ctg3197	1502	Psa.0265.K02	28	32	59
ctg10339	1503	Psa.0089.D23	65	36	100
ctg10339	1504	Psa.0301.G10	28	101	128
ctg10339	1505	Psa.0391.L22	15	105	119
ctg10339	1506	Psa.0502.K06	34	113	146
ctg10339	1507	Psa.0330.I08	20	103	122
ctg10339	1508	Psa.0566.A10	57	55	111
ctg10339	1509	Psa.0341.K05	42	71	112
ctg10339	1510	Psa.0018.D08	66	46	111
ctg10339	1511	Psa.0360.H21	35	77	111
ctg10339	1512	Psa.0757.H18	61	44	104
ctg10339	1513	Psa.0102.E03	12	104	115
ctg10339	1514	Psa.0735.D04	51	63	113
ctg10339	1515	Psa.0265.P06	37	105	141
ctg10339	1516	Psa.0429.P12	27	103	129
ctg10339	1517	Psa.0710.C05	52	45	96
ctg10339	1518	Psa.0135.E08	26	86	111
ctg2567	1519	Psa.0644.G06	42	234	275
ctg2567	1520	Psa.0451.D11	34	260	293
ctg2567	1521	Psa.0489.D13	50	231	280
ctg2567	1522	Psa.0763.F18	33	261	293
ctg2567	1523	Psa.0507.G02	51	217	267
ctg2567	1524	Psa.0595.I08	34	254	287
ctg4607	1525	Psa.0101.D09	33	161	193
ctg4607	1526	Psa.0111.P08	31	164	194
ctg4607	1527	Psa.0451.C06	41	141	181
ctg4607	1528	Psa.0684.C03	28	162	189
ctg4607	1529	Psa.0198.L17	33	169	201
ctg10010	1530	Psa.0145.B02	37	0	36
ctg10010	1531	Psa.0066.F13	35	15	49
ctg10010	1532	Psa.0451.J12	56	5	60
ctg10010	1533	Psa.0495.J06	47	24	70
ctg10010	1534	Psa.0662.F01	53	2	54
ctg1023	1535	Psa.0415.H16	31	274	304
ctg1023	1536	Psa.0584.A17	32	276	307
ctg1023	1537	Psa.0476.K01	50	276	325
ctg1023	1538	Psa.0486.G06	39	269	307
ctg1023	1539	Psa.0178.B22	20	279	298
ctg1023	1540	Psa.0317.N08	33	274	306
ctg1023	1541	Psa.0733.P22	45	286	330
ctg1023	1542	Psa.0064.O11	39	263	301
ctg1023	1543	Psa.0407.H24	41	274	314
ctg1023	1544	Psa.0767.L18	36	273	308
ctg4427	1545	Psa.0187.E18	19	28	46
ctg4427	1546	Psa.0560.A09	15	32	46
ctg4427	1547	Psa.0338.J19	32	31	62
ctg4427	1548	Psa.0202.L07	14	37	50
ctg17668	1549	Psa.0332.P23	36	2	37
ctg12009	1550	Psa.0394.P19	35	3	37
ctg17668	1551	Psa.0299.F24	26	0	25
ctg848	1552	Psa.0051.G24	32	40	71
ctg848	1553	Psa.0269.J04	51	22	72
ctg848	1554	Psa.0552.N02	37	52	88
ctg848	1555	Psa.0146.F21	44	31	74
ctg848	1556	Psa.0076.E23	37	35	71
ctg848	1557	Psa.0432.P12	62	22	83
ctg848	1558	Psa.0755.O21	33	58	90
ctg9986	1559	Psa.0308.A12	33	104	136
ctg9986	1560	Psa.0324.P16	43	111	153
ctg9986	1561	Psa.0655.L10	27	93	119
ctg9986	1562	Psa.0394.G13	27	97	123
ctg6150	1563	Psa.0146.M04	30	74	103
ctg6150	1564	Psa.0079.E17	33	75	107
ctg6150	1565	Psa.0570.E12	18	91	108
ctg6150	1566	Psa.0482.I12	40	74	113
ctg3361	1567	Psa.0308.D19	21	219	239
ctg3361	1568	Psa.0369.B16	30	222	251
ctg11277	1569	Psa.0329.F04	37	62	98
ctg11277	1570	Psa.0426.L15	31	71	101
ctg11277	1571	Psa.0268.E19	45	76	120
ctg11277	1572	Psa.0251.C20	30	62	91
ctg11277	1573	Psa.0608.C03	21	92	112
ctg11277	1574	Psa.0263.F16	38	86	123
ctg11277	1575	Psa.0062.C08	47	92	138
ctg11277	1576	Psa.0299.E23	48	97	144
ctg10545	1577	Psa.0555.K06	32	302	333
ctg12688	1578	Psa.0441.F13	53	0	52
ctg10545	1579	Psa.0500.O23	43	308	350
ctg10545	1580	Psa.0241.J21	40	301	340
ctg10545	1581	Psa.0213.C04	45	276	320
ctg10545	1582	Psa.0207.H20	42	303	344
ctg1871	1583	Psa.0612.L01	30	31	60
ctg12688	1584	Psa.0038.N09	37	14	50
ctg1871	1585	Psa.0348.C24	15	44	58
ctg2283	1586	Psa.0676.F10	42	21	62
ctg2283	1587	Psa.0551.O01	47	9	55
ctg2283	1588	Psa.0690.P14	42	35	76
ctg2283	1589	Psa.0317.P08	28	30	57
ctg2283	1590	Psa.0484.D09	53	9	61
ctg2283	1591	Psa.0180.G11	48	3	50
ctg10323	1592	Psa.0654.O12	36	130	165
ctg10323	1593	Psa.0534.F19	38	111	148
ctg10323	1594	Psa.0738.K03	18	129	146
ctg10323	1595	Psa.0754.P24	41	118	158
ctg10323	1596	Psa.0329.I20	55	122	176
ctg10323	1597	Psa.0409.A02	40	129	168
ctg10323	1598	Psa.0376.H15	47	129	175
ctg10323	1599	Psa.0765.A08	34	123	156
ctg10323	1600	Psa.0402.N16	48	116	163
ctg10323	1601	Psa.0122.M05	47	113	159
ctg10323	1602	Psa.0662.M18	46	97	142
ctg10323	1603	Psa.0630.K15	41	106	146
ctg18555	1604	Psa.0594.B10	36	2	37
ctg18555	1605	Psa.0524.A14	23	0	22
ctg18555	1606	Psa.0447.O02	42	2	43
ctg14095	1607	Psa.0129.K07	55	10	64
ctg14095	1608	Psa.0296.P24	64	0	63
ctg14095	1609	Psa.0080.K08	33	29	61
ctg14095	1610	Psa.0770.D04	56	13	68
ctg17461	1611	Psa.0529.F14	32	11	42
ctg661	1612	Psa.0269.F17	27	110	136
ctg661	1613	Psa.0453.C06	30	111	140
ctg17461	1614	Psa.0456.I16	44	0	43
ctg17461	1615	Psa.0275.A06	38	7	44
ctg661	1616	Psa.0158.D02	25	117	141
ctg661	1617	Psa.0007.G19	32	103	134
ctg661	1618	Psa.0609.K21	28	109	136
ctg661	1619	Psa.0434.N10	26	103	128
ctg11442	1620	Psa.0320.O06	42	64	105
ctg11442	1621	Psa.0248.I21	52	46	97
ctg11442	1622	Psa.0115.P18	53	26	78
ctg11442	1623	Psa.0582.P03	6	22	27
ctg11442	1624	Psa.0217.G13	41	44	84
ctg322	1625	Psa.0643.C16	34	289	322
ctg322	1626	Psa.0204.G03	47	274	320
ctg322	1627	Psa.0082.D24	44	282	325
ctg322	1628	Psa.0236.H07	41	292	332
ctg322	1629	Psa.0482.C11	38	285	322
ctg322	1630	Psa.0488.F07	37	302	338
ctg322	1631	Psa.0585.E21	25	291	315
ctg322	1632	Psa.0670.I01	28	322	349
ctg1023	1633	Psa.0712.I02	34	205	238
ctg1023	1634	Psa.0404.K08	35	205	239
ctg1023	1635	Psa.0432.B24	34	205	238
ctg1023	1636	Psa.0516.H19	32	206	237
ctg2197	1637	Psa.0126.E07	29	187	215
ctg2197	1638	Psa.0316.I21	45	181	225
ctg2197	1639	Psa.0136.M12	51	180	230
ctg2197	1640	Psa.0598.I21	23	185	207
ctg2197	1641	Psa.0149.M07	49	184	232
ctg11267	1642	Psa.0639.A22	25	0	24
ctg11267	1643	Psa.0599.B02	35	15	49
ctg11267	1644	Psa.0208.D12	46	14	59
ctg11267	1645	Psa.0537.C20	25	0	24
ctg11267	1646	Psa.0508.A11	24	6	29
ctg3177	1647	Psa.0283.F12	40	27	66
ctg125	1648	Psa.0438.P22	65	86	150
ctg3177	1649	Psa.0708.I16	33	19	51
singleton	1650	Psa.0448.I16	15
ctg2711	1651	Psa.0437.F01	39	121	159
ctg2711	1652	Psa.0330.H19	30	128	157
ctg2711	1653	Psa.0211.D02	33	116	148
ctg10379	1654	Psa.0599.H19	25	109	133
ctg10379	1655	Psa.0198.E11	42	101	142
ctg10379	1656	Psa.0290.P23	25	106	130
ctg10379	1657	Psa.0215.J21	29	112	140
ctg10379	1658	Psa.0141.C05	17	117	133
ctg10379	1659	Psa.0224.J02	20	116	135
ctg10379	1660	Psa.0430.G07	44	102	145
ctg4242	1661	Psa.0582.J07	27	207	233
ctg4242	1662	Psa.0769.O11	34	208	241
ctg4242	1663	Psa.0661.F14	42	200	241
ctg4242	1664	Psa.0629.N01	35	194	228
ctg4242	1665	Psa.0181.F06	33	194	226
ctg556	1666	Psa.0095.M22	46	170	215
ctg556	1667	Psa.0428.F23	14	189	202
ctg556	1668	Psa.0190.A24	64	196	259
ctg556	1669	Psa.0377.D19	67	197	263
ctg556	1670	Psa.0473.O11	59	197	255
ctg556	1671	Psa.0363.C09	54	167	220
ctg556	1672	Psa.0518.P14	42	180	221
ctg556	1673	Psa.0062.F07	45	196	240
ctg556	1674	Psa.0545.I19	43	184	226
ctg556	1675	Psa.0507.O05	48	186	233
ctg14130	1676	Psa.0344.L02	19	7	25
ctg14130	1677	Psa.0391.I16	17	13	29
ctg14130	1678	Psa.0218.O21	21	9	29
ctg14130	1679	Psa.0082.B24	14	11	24
ctg3553	1680	Psa.0596.J24	35	91	125
ctg3553	1681	Psa.0220.B15	35	92	126
ctg3553	1682	Psa.0350.D12	42	89	130
ctg3553	1683	Psa.0411.K10	34	100	133
ctg3553	1684	Psa.0500.J11	33	94	126
ctg3553	1685	Psa.0391.F19	44	93	136
ctg417	1686	Psa.0436.I18	39	137	175
ctg417	1687	Psa.0539.A07	31	146	176
ctg417	1688	Psa.0207.N12	48	140	187
ctg417	1689	Psa.0241.A12	43	154	196
ctg417	1690	Psa.0220.J21	37	157	193
ctg417	1691	Psa.0576.F05	26	148	173
ctg417	1692	Psa.0506.A10	34	124	157
ctg48	1693	Psa.0071.A15	47	78	124
ctg48	1694	Psa.0690.M14	31	101	131
ctg959	1695	Psa.0731.P23	27	43	69
ctg48	1696	Psa.0185.C05	34	111	144
ctg48	1697	Psa.0612.H19	21	114	134
ctg48	1698	Psa.0239.J03	36	99	134
ctg48	1699	Psa.0389.E24	33	91	123
ctg48	1700	Psa.0042.B01	29	102	130
singleton	1701	Psa.0228.A23	31
ctg959	1702	Psa.0180.M16	33	57	89
ctg48	1703	Psa.0246.J12	27	96	122
ctg48	1704	Psa.0161.C14	46	83	128
ctg1823	1705	Psa.0647.A10	53	0	52
ctg1823	1706	Psa.0555.J20	54	7	60
ctg1823	1707	Psa.0165.F06	27	2	28
ctg1823	1708	Psa.0046.C01	51	2	52
ctg109	1709	Psa.0178.C10	56	83	138
ctg109	1710	Psa.0142.A18	52	85	136
ctg109	1711	Psa.0110.O21	74	103	176
ctg109	1712	Psa.0679.N18	56	86	141
ctg12010	1713	Psa.0441.D13	25	21	45
ctg12010	1714	Psa.0486.M12	28	22	49
singleton	1715	Psa.0749.I06	25
ctg109	1716	Psa.0229.L16	50	135	184
ctg109	1717	Psa.0338.I07	63	96	158
ctg2100	1718	Psa.0439.G07	34	104	137
ctg2100	1719	Psa.0481.M04	38	119	156
ctg2100	1720	Psa.0191.E03	34	114	147
ctg2100	1721	Psa.0473.P06	43	114	156
ctg2100	1722	Psa.0389.N04	42	116	157
ctg2100	1723	Psa.0499.F05	33	105	137
ctg2100	1724	Psa.0383.I03	27	112	138
ctg10077	1725	Psa.0767.P05	16	65	80
ctg4641	1726	Psa.0615.P12	36	11	46
ctg4641	1727	Psa.0534.C11	48	4	51
ctg4641	1728	Psa.0575.F23	42	0	41
ctg4641	1729	Psa.0060.K04	43	7	49
ctg3377	1730	Psa.0611.G10	36	0	35
ctg10950	1731	Psa.0715.G10	32	180	211
ctg10950	1732	Psa.0407.M17	28	179	206
ctg2428	1733	Psa.0385.M18	41	76	116
ctg10950	1734	Psa.0653.B13	27	179	205
ctg3285	1735	Psa.0739.M17	12	373	384
ctg3285	1736	Psa.0123.E03	35	357	391
ctg10950	1737	Psa.0483.H08	30	179	208
ctg2428	1738	Psa.0343.I18	40	62	101
ctg10950	1739	Psa.0723.E24	32	176	207
ctg3285	1740	Psa.0190.M05	25	376	400
ctg10950	1741	Psa.0514.I06	21	190	210
ctg3285	1742	Psa.0070.G14	25	367	391
ctg10950	1743	Psa.0711.C03	25	174	198
ctg3005	1744	Psa.0758.C11	51	116	166
ctg3005	1745	Psa.0437.E11	55	128	182
ctg3005	1746	Psa.0493.F07	55	123	177
ctg3005	1747	Psa.0048.O05	46	131	176
ctg3005	1748	Psa.0506.B17	49	134	182
ctg9974	1749	Psa.0406.K17	49	219	267
ctg9974	1750	Psa.0165.P10	18	217	234
ctg9974	1751	Psa.0352.B08	21	211	231
ctg4457	1752	Psa.0509.M12	43	107	149
ctg4457	1753	Psa.0384.M24	31	116	146
ctg4457	1754	Psa.0325.A14	51	118	168
ctg4457	1755	Psa.0374.P17	31	104	134
ctg4457	1756	Psa.0480.P18	47	103	149
ctg4457	1757	Psa.0543.M06	24	117	140
ctg1152	1758	Psa.0118.O03	32	299	330
ctg1152	1759	Psa.0076.J17	49	306	354
ctg1152	1760	Psa.0389.E18	27	287	313
ctg1152	1761	Psa.0544.D13	22	301	322
ctg1152	1762	Psa.0031.P13	19	297	315
ctg1152	1763	Psa.0122.K23	54	320	373
ctg1152	1764	Psa.0439.G06	29	295	323
ctg1152	1765	Psa.0447.I19	28	297	324
ctg1152	1766	Psa.0259.P05	38	287	324
ctg10365	1767	Psa.0311.M24	33	4	36
ctg10365	1768	Psa.0410.E21	32	0	31
ctg10365	1769	Psa.0681.D06	31	8	38
ctg11435	1770	Psa.0483.A17	48	94	141
ctg11435	1771	Psa.0020.O09	20	78	97
ctg11435	1772	Psa.0444.H06	46	83	128
ctg11435	1773	Psa.0756.H08	29	77	105
ctg11435	1774	Psa.0595.O14	34	84	117
ctg11435	1775	Psa.0634.G24	26	82	107
ctg11435	1776	Psa.0684.O10	37	96	132
ctg11435	1777	Psa.0733.M18	27	81	107
ctg11236	1778	Psa.0251.O18	35	120	154
ctg11236	1779	Psa.0131.E22	30	109	138
ctg11236	1780	Psa.0648.C11	17	104	120
ctg2158	1781	Psa.0602.L02	40	85	124
ctg2158	1782	Psa.0758.M01	53	47	99
ctg13464	1783	Psa.0059.F08	37	1	37
ctg8941	1784	Psa.0079.P22	51	127	177
ctg8941	1785	Psa.0218.P17	41	117	157
ctg8941	1786	Psa.0452.D03	54	91	144
ctg12094	1787	Psa.0337.A17	28	0	27
ctg12094	1788	Psa.0474.L11	28	3	30
ctg461	1789	Psa.0061.F14	42	773	814
ctg461	1790	Psa.0354.C13	44	795	838
ctg461	1791	Psa.0309.I17	49	792	840
ctg461	1792	Psa.0336.E04	52	786	837
ctg461	1793	Psa.0459.G15	50	796	845
ctg461	1794	Psa.0534.B12	36	774	809
ctg5159	1795	Psa.0110.F02	40	200	239
ctg5159	1796	Psa.0177.E17	23	208	230
ctg5159	1797	Psa.0505.J24	29	208	236
ctg5159	1798	Psa.0221.D04	37	205	241
ctg5159	1799	Psa.0415.G24	26	212	237
ctg419	1800	Psa.0429.C16	38	70	107
ctg419	1801	Psa.0441.P19	68	47	114
ctg419	1802	Psa.0572.A07	32	85	116
ctg419	1803	Psa.0478.K09	44	52	95
ctg419	1804	Psa.0049.K07	29	67	95
ctg419	1805	Psa.0273.A04	30	73	102
ctg419	1806	Psa.0160.G15	10	86	95
ctg7182	1807	Psa.0633.K19	57	28	84
ctg7182	1808	Psa.0475.M14	65	14	78
ctg7182	1809	Psa.0767.G18	58	30	87
ctg7182	1810	Psa.0072.O21	67	25	91
ctg7182	1811	Psa.0049.E17	48	25	72
ctg7182	1812	Psa.0485.O13	65	41	105
ctg7182	1813	Psa.0053.C08	49	24	72
ctg7182	1814	Psa.0742.K15	58	61	118
ctg7182	1815	Psa.0726.E07	24	52	75
ctg16999	1816	Psa.0313.J21	39	0	38
ctg16999	1817	Psa.0522.A19	12	25	36
ctg16999	1818	Psa.0231.C19	37	1	37
ctg17421	1819	Psa.0271.K01	35	6	40
ctg16911	1820	Psa.0534.B20	33	1	33
ctg3115	1821	Psa.0473.A21	34	289	322
ctg3115	1822	Psa.0457.L16	46	291	336
ctg3115	1823	Psa.0430.C22	56	312	367
ctg3115	1824	Psa.0747.M19	45	309	353
ctg3115	1825	Psa.0187.P10	57	311	367
ctg15432	1826	Psa.0704.H07	37	1	37
ctg990	1827	Psa.0210.K07	33	15	47
ctg990	1828	Psa.0126.F02	37	12	48
ctg12281	1829	Psa.0053.N24	40	0	39
ctg12281	1830	Psa.0160.F14	20	8	27
ctg990	1831	Psa.0246.C08	31	17	47
ctg1653	1832	Psa.0397.I12	20	6	25
ctg1653	1833	Psa.0741.J14	15	8	22
ctg1653	1834	Psa.0496.O08	41	8	48
ctg1653	1835	Psa.0599.H09	18	6	23
ctg1653	1836	Psa.0214.L21	32	3	34
ctg1653	1837	Psa.0511.C19	22	0	21
ctg1653	1838	Psa.0335.C24	35	10	44
ctg10640	1839	Psa.0083.O21	42	0	41
ctg10640	1840	Psa.0671.O01	54	49	102
ctg10640	1841	Psa.0353.N10	54	46	99
ctg10640	1842	Psa.0258.B10	54	49	102
ctg10640	1843	Psa.0644.C04	53	48	100
ctg10640	1844	Psa.0763.D13	54	44	97
ctg10640	1845	Psa.0007.L10	49	50	98
ctg10640	1846	Psa.0583.G20	48	48	95
ctg1717	1847	Psa.0583.M04	51	26	76
ctg1717	1848	Psa.0614.B10	54	30	83
ctg1717	1849	Psa.0219.D11	71	28	98
ctg1717	1850	Psa.0605.O01	65	16	80
ctg1717	1851	Psa.0489.D17	66	32	97
ctg1717	1852	Psa.0092.A24	67	24	90
ctg1717	1853	Psa.0523.A02	32	23	54
ctg1717	1854	Psa.0686.O23	44	0	43
ctg2101	1855	Psa.0697.E17	35	513	547
ctg2101	1856	Psa.0128.B23	28	525	552
ctg2101	1857	Psa.0375.I19	33	522	554
ctg2101	1858	Psa.0314.A22	31	526	556
ctg2101	1859	Psa.0705.G17	29	529	557
ctg1868	1860	Psa.0491.D01	46	175	220
ctg1868	1861	Psa.0120.E23	46	163	208
ctg1868	1862	Psa.0503.J17	46	175	220
ctg1868	1863	Psa.0724.L11	43	162	204
singleton	1864	Psa.0535.M22	14
ctg4126	1865	Psa.0214.D06	42	197	238
ctg4126	1866	Psa.0711.L04	34	194	227
ctg4126	1867	Psa.0209.D19	36	201	236
ctg17182	1868	Psa.0087.F03	7	7	13
ctg10176	1869	Psa.0606.P14	55	19	73
ctg17182	1870	Psa.0374.J23	7	5	11
ctg17182	1871	Psa.0250.B11	14	0	13
ctg1811	1872	Psa.0195.C21	45	6	50
ctg1811	1873	Psa.0427.O15	21	43	63
ctg1811	1874	Psa.0644.F01	28	41	68
ctg1811	1875	Psa.0259.N16	21	50	70
ctg1811	1876	Psa.0096.J15	19	44	62
ctg1811	1877	Psa.0269.C05	27	35	61
ctg951	1878	Psa.0532.L24	35	371	405
ctg951	1879	Psa.0329.O06	32	361	392
ctg951	1880	Psa.0646.C16	33	357	389
ctg2839	1881	Psa.0744.K16	15	97	111
ctg2839	1882	Psa.0393.B10	27	97	123
ctg2839	1883	Psa.0098.D17	13	93	105
ctg2839	1884	Psa.0071.A03	16	85	100
ctg2839	1885	Psa.0178.I18	16	84	99
ctg2839	1886	Psa.0640.B01	11	99	109
ctg2839	1887	Psa.0255.H22	20	93	112
ctg10040	1888	Psa.0619.E04	34	611	644
ctg10040	1889	Psa.0092.M04	27	621	647
ctg10040	1890	Psa.0250.N20	30	603	632
ctg14007	1891	Psa.0077.B01	33	0	32
ctg10040	1892	Psa.0724.B14	38	617	654
ctg10040	1893	Psa.0744.F03	33	618	650
ctg10040	1894	Psa.0197.L03	46	623	668
ctg10040	1895	Psa.0380.N02	29	603	631
ctg10040	1896	Psa.0539.G14	20	612	631
ctg10040	1897	Psa.0209.C23	46	604	649
ctg13960	1898	Psa.0258.C06	32	7	38
ctg10107	1899	Psa.0500.J08	23	23	45
ctg13960	1900	Psa.0075.L12	24	11	34
ctg13960	1901	Psa.0452.E13	34	5	38
ctg10107	1902	Psa.0460.N15	27	23	49
ctg10107	1903	Psa.0279.G12	25	27	51
ctg6385	1904	Psa.0184.J05	46	12	57
ctg6385	1905	Psa.0440.M02	24	35	58
ctg4367	1906	Psa.0183.B18	45	131	175
ctg4367	1907	Psa.0079.D08	33	106	138
ctg19205	1908	Psa.0764.K02	25	2	26
ctg19205	1909	Psa.0708.C14	19	0	18
ctg14818	1910	Psa.0552.I14	34	7	40
ctg10287	1911	Psa.0619.P03	23	1	23
ctg10287	1912	Psa.0767.G09	24	0	23
ctg10287	1913	Psa.0495.D18	6	32	37
ctg10287	1914	Psa.0048.D07	18	5	22
ctg10287	1915	Psa.0732.L21	13	0	12
ctg10287	1916	Psa.0248.I22	32	2	33
ctg6453	1917	Psa.0413.N08	19	134	152
ctg6453	1918	Psa.0060.G02	31	117	147
ctg6453	1919	Psa.0265.C14	31	115	145
ctg6453	1920	Psa.0388.B12	41	126	166
ctg6453	1921	Psa.0543.N19	29	124	152
ctg6453	1922	Psa.0720.K02	33	124	156
ctg3152	1923	Psa.0040.E11	27	54	80
ctg3152	1924	Psa.0202.A22	45	47	91
ctg3152	1925	Psa.0506.C14	42	58	99
ctg3152	1926	Psa.0290.I06	33	59	91
ctg3152	1927	Psa.0219.O14	35	55	89
ctg3152	1928	Psa.0282.E20	33	52	84
ctg1127	1929	Psa.0557.J21	51	347	397
ctg1127	1930	Psa.0181.O08	30	376	405
ctg16527	1931	Psa.0424.K04	27	5	31
ctg14055	1932	Psa.0695.I12	27	4	30
ctg14055	1933	Psa.0648.H19	21	10	30
ctg14055	1934	Psa.0292.C06	26	0	25
ctg14055	1935	Psa.0079.A15	28	1	28
ctg14055	1936	Psa.0359.K16	26	5	30
ctg14933	1937	Psa.0442.E10	34	3	36
ctg14933	1938	Psa.0109.I04	27	0	26
ctg18446	1939	Psa.0420.H01	17	0	16
ctg18446	1940	Psa.0542.A12	16	0	15
ctg408	1941	Psa.0483.P12	52	104	155
ctg408	1942	Psa.0747.F21	30	101	130
ctg408	1943	Psa.0122.E05	39	93	131
ctg408	1944	Psa.0765.H02	38	96	133
ctg408	1945	Psa.0312.B14	45	110	154
ctg408	1946	Psa.0024.E02	34	93	126
ctg408	1947	Psa.0371.B19	34	97	130
ctg11640	1948	Psa.0087.K21	38	97	134
ctg11640	1949	Psa.0109.B05	32	106	137
ctg11640	1950	Psa.0138.P16	32	123	154
ctg5097	1951	Psa.0587.K22	30	0	29
ctg11640	1952	Psa.0671.H04	27	117	143
ctg11640	1953	Psa.0544.H14	32	107	138
ctg11640	1954	Psa.0729.G12	32	124	155
ctg5097	1955	Psa.0503.N18	58	9	66
ctg11640	1956	Psa.0629.A17	37	117	153
ctg3387	1957	Psa.0134.D15	27	146	172
ctg3387	1958	Psa.0167.C10	27	130	156
ctg3387	1959	Psa.0141.H15	20	147	166
ctg1067	1960	Psa.0230.F12	51	74	124
ctg3436	1961	Psa.0687.D12	21	0	20
ctg1245	1962	Psa.0150.N17	17	309	325
ctg1245	1963	Psa.0170.L02	29	300	328
ctg1067	1964	Psa.0097.N14	38	69	106
ctg3387	1965	Psa.0477.I22	24	144	167
ctg3387	1966	Psa.0610.D03	24	154	177
ctg4118	1967	Psa.0048.P16	23	440	462
ctg4118	1968	Psa.0225.N01	24	445	468
ctg4118	1969	Psa.0451.D16	46	410	455
ctg4118	1970	Psa.0289.M13	30	440	469
ctg4118	1971	Psa.0600.J01	23	444	466
ctg4118	1972	Psa.0463.A05	37	420	456
ctg4118	1973	Psa.0694.E15	17	458	474
ctg902	1974	Psa.0575.I05	12	137	148
ctg902	1975	Psa.0379.L16	22	133	154
ctg902	1976	Psa.0186.M05	51	112	162
ctg902	1977	Psa.0741.O03	26	138	163
ctg902	1978	Psa.0136.B03	22	144	165
ctg902	1979	Psa.0426.D23	29	136	164
ctg902	1980	Psa.0724.P13	42	102	143
ctg3446	1981	Psa.0048.K03	19	22	40
ctg902	1982	Psa.0326.I15	65	94	158
ctg3446	1983	Psa.0671.J21	27	0	26
ctg2773	1984	Psa.0665.A04	21	78	98
ctg2773	1985	Psa.0724.C18	24	80	103
ctg2773	1986	Psa.0768.J08	28	68	95
ctg167	1987	Psa.0081.O19	40	304	343
ctg167	1988	Psa.0239.G04	45	300	344
ctg167	1989	Psa.0212.P15	17	332	348
ctg167	1990	Psa.0747.E11	35	321	355
ctg167	1991	Psa.0569.C13	48	306	353
ctg167	1992	Psa.0325.D15	40	301	340
ctg7865	1993	Psa.0458.G23	27	127	153
ctg7865	1994	Psa.0691.G18	20	123	142
ctg7865	1995	Psa.0245.G08	31	131	161
ctg7865	1996	Psa.0314.E03	18	120	137
ctg5272	1997	Psa.0202.I23	25	122	146
ctg5272	1998	Psa.0755.J06	20	124	143
ctg5272	1999	Psa.0406.H22	22	127	148
[truncated: 218,014+ more rows]
[truncated: 2 more columns]
